# Supplementary material for: Insertion of Phosphenium Ions into a Bicyclo[1.1.0]Tetraphosphabutane Iron Complex
Source: MDPI journal article supplement (doi:10.3390/molecules26133920), 2021-06-26
Supplement: s1 [file s1]

# Insertion of phosphonium ions into an iron stabilized bicyclo[1.1.0]tetraphosphabutane motif

## Supplementary Information

Martin Weber <sup>1</sup>, Gábor Balázs <sup>1</sup>, Alexander V. Virovets <sup>1</sup>, Eugenia Peresypkina <sup>1</sup> and Manfred Scheer <sup>1,\*</sup>

<sup>1</sup> Institute of Inorganic Chemistry, University of Regensburg, Universitätsstrasse

31, 93040 Regensburg (Germany)

\* Correspondence: manfred.scheer@ur.de

### Contents

|                                                                                                                                    |    |
|------------------------------------------------------------------------------------------------------------------------------------|----|
| Supplementary Information.....                                                                                                     | 1  |
| 1 NMR data and spectra .....                                                                                                       | 2  |
| 1.1 NMR data from simulations.....                                                                                                 | 2  |
| 1.2 NMR spectra of reactions of <b>1</b> with [Ph <sub>2</sub> P][OTf] at 193 K .....                                              | 4  |
| 1.3 NMR spectra of reactions of <b>1</b> with [Me <sub>2</sub> P][OTf] at 193 K .....                                              | 9  |
| 1.4 NMR spectra of the reaction of <b>1</b> with in situ generated [Ph <sub>2</sub> P][PF <sub>6</sub> ] at room temperature ..... | 13 |
| 1.5 NMR spectra of the reaction of <b>1</b> with in situ generated [Ph <sub>2</sub> As][OTf]... 15                                 |    |
| 2 Crystallographic details .....                                                                                                   | 21 |
| 2.1 Crystallographic details on <b>3a</b> .....                                                                                    | 21 |
| 2.2 Crystallographic details on <b>4</b> .....                                                                                     | 21 |
| 2.3 Crystallographic details on <b>5</b> .....                                                                                     | 22 |
| 2.4 Crystallographic data .....                                                                                                    | 23 |
| 2.5 Solid state structures .....                                                                                                   | 24 |
| 3 Details on DFT-calculations .....                                                                                                | 27 |
| 3.1 General remarks .....                                                                                                          | 27 |
| 3.2 Thermodynamic data from frequency calculations.....                                                                            | 27 |
| 3.3 Cartesian coordinates of optimised structures .....                                                                            | 27 |
| Appendix .....                                                                                                                     | 41 |
| List of Figures .....                                                                                                              | 41 |
| List of Tables.....                                                                                                                | 42 |
| References.....                                                                                                                    | 43 |

# 1 NMR data and spectra

## 1.1 NMR data from simulations

**Table S1:**  $^{31}\text{P}\{^1\text{H}\}$  NMR data of **2a**: ( $\text{CD}_2\text{Cl}_2$ ; 193 K) with assignment of the individual phosphorus atoms:

|                                                                                   | $\delta$ (ppm)      |        | $J$ (Hz)                                    |     |                                             |     |
|-----------------------------------------------------------------------------------|---------------------|--------|---------------------------------------------|-----|---------------------------------------------|-----|
| 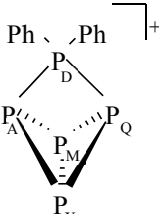 | $\text{P}_\text{A}$ | 54.5   | $^1J_{\text{P}_\text{A} \text{P}_\text{D}}$ | 379 | $^1J_{\text{P}_\text{M} \text{P}_\text{X}}$ | 228 |
|                                                                                   | $\text{P}_\text{D}$ | 3.9    | $^1J_{\text{P}_\text{A} \text{P}_\text{M}}$ | 256 | $^1J_{\text{P}_\text{Q} \text{P}_\text{X}}$ | 122 |
|                                                                                   | $\text{P}_\text{M}$ | -80.7  | $^1J_{\text{P}_\text{A} \text{P}_\text{X}}$ | 134 | $^2J_{\text{P}_\text{A} \text{P}_\text{Q}}$ | 19  |
|                                                                                   | $\text{P}_\text{Q}$ | -135.0 | $^1J_{\text{P}_\text{D} \text{P}_\text{Q}}$ | 254 | $^2J_{\text{P}_\text{D} \text{P}_\text{M}}$ | 29  |
|                                                                                   | $\text{P}_\text{X}$ | -192.8 | $^1J_{\text{P}_\text{M} \text{P}_\text{Q}}$ | 211 | $^2J_{\text{P}_\text{D} \text{P}_\text{X}}$ | 24  |

**Table S2:**  $^{31}\text{P}\{^1\text{H}\}$  NMR data of **3a**: ( $\text{CD}_2\text{Cl}_2$ ; 193 K) with assignment of the individual phosphorus atoms:

|                                                                                     | $\delta$ (ppm)      |        | $J$ (Hz)                                    |     |                                             |     |
|-------------------------------------------------------------------------------------|---------------------|--------|---------------------------------------------|-----|---------------------------------------------|-----|
| 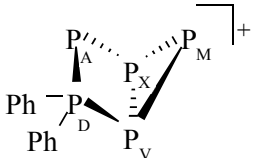 | $\text{P}_\text{A}$ | 78.4   | $^1J_{\text{P}_\text{A} \text{P}_\text{D}}$ | 390 | $^1J_{\text{P}_\text{V} \text{P}_\text{X}}$ | 119 |
|                                                                                     | $\text{P}_\text{D}$ | 35.0   | $^1J_{\text{P}_\text{A} \text{P}_\text{X}}$ | 218 | $^2J_{\text{P}_\text{D} \text{P}_\text{M}}$ | 76  |
|                                                                                     | $\text{P}_\text{M}$ | -31.7  | $^1J_{\text{P}_\text{D} \text{P}_\text{V}}$ | 283 | $^2J_{\text{P}_\text{D} \text{P}_\text{X}}$ | 68  |
|                                                                                     | $\text{P}_\text{V}$ | -134.5 | $^1J_{\text{P}_\text{M} \text{P}_\text{V}}$ | 190 |                                             |     |
|                                                                                     | $\text{P}_\text{X}$ | -148.7 | $^1J_{\text{P}_\text{M} \text{P}_\text{X}}$ | 260 |                                             |     |

**Table S3:**  $^{31}\text{P}\{^1\text{H}\}$  NMR data of **2b**: ( $\text{CD}_2\text{Cl}_2$ ; 193 K) with assignment of the individual phosphorus atoms:

|                                                                                     | $\delta$ (ppm)      |        | $J$ (Hz)                                    |     |                                             |     |
|-------------------------------------------------------------------------------------|---------------------|--------|---------------------------------------------|-----|---------------------------------------------|-----|
| 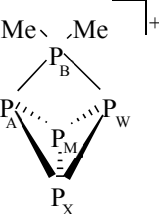 | $\text{P}_\text{A}$ | 45.6   | $^1J_{\text{P}_\text{A} \text{P}_\text{B}}$ | 352 | $^1J_{\text{P}_\text{W} \text{P}_\text{X}}$ | 261 |
|                                                                                     | $\text{P}_\text{B}$ | 37.4   | $^1J_{\text{P}_\text{A} \text{P}_\text{W}}$ | 223 | $^2J_{\text{P}_\text{B} \text{P}_\text{W}}$ | 60  |
|                                                                                     | $\text{P}_\text{M}$ | -48.6  | $^1J_{\text{P}_\text{B} \text{P}_\text{M}}$ | 265 | $^2J_{\text{P}_\text{M} \text{P}_\text{W}}$ | 99  |
|                                                                                     | $\text{P}_\text{W}$ | -146.0 | $^1J_{\text{P}_\text{B} \text{P}_\text{X}}$ | 106 |                                             |     |
|                                                                                     | $\text{P}_\text{X}$ | -150.7 | $^1J_{\text{P}_\text{M} \text{P}_\text{X}}$ | 192 |                                             |     |

**Table S4:**  $^{31}\text{P}\{^1\text{H}\}$  NMR data of **3b**: ( $\text{CD}_2\text{Cl}_2$ ; 193 K) with assignment of the individual phosphorus atoms:

|                                                                                   | $\delta$ (ppm) |        | $J$ (Hz)                                    |     |                                             |     |
|-----------------------------------------------------------------------------------|----------------|--------|---------------------------------------------|-----|---------------------------------------------|-----|
| 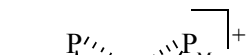 | P <sub>A</sub> | 39.6   | $^1J_{\text{P}_\text{A} \text{P}_\text{D}}$ | 353 | $^1J_{\text{P}_\text{M} \text{P}_\text{X}}$ | 237 |
|                                                                                   | P <sub>D</sub> | 2.1    | $^1J_{\text{P}_\text{A} \text{P}_\text{M}}$ | 243 | $^1J_{\text{P}_\text{Q} \text{P}_\text{X}}$ | 114 |
|                                                                                   | P <sub>M</sub> | -82.6  | $^1J_{\text{P}_\text{A} \text{P}_\text{X}}$ | 130 | $^2J_{\text{P}_\text{A} \text{P}_\text{Q}}$ | 25  |
|                                                                                   | P <sub>Q</sub> | -140.2 | $^1J_{\text{P}_\text{D} \text{P}_\text{Q}}$ | 244 | $^2J_{\text{P}_\text{D} \text{P}_\text{M}}$ | 32  |
|                                                                                   | P <sub>X</sub> | -182.3 | $^1J_{\text{P}_\text{M} \text{P}_\text{Q}}$ | 206 | $^2J_{\text{P}_\text{D} \text{P}_\text{X}}$ | 26  |
|                                                                                   |                |        |                                             |     |                                             |     |

**Table S5:**  $^{31}\text{P}\{^1\text{H}\}$  NMR data of **4**: ( $\text{CD}_2\text{Cl}_2$ ; 300 K) with assignment of the individual phosphorus atoms:

|  | $\delta$ (ppm)      |       | $J$ (Hz)                                    |     |                                             |    |
|-----------------------------------------------------------------------------------|---------------------|-------|---------------------------------------------|-----|---------------------------------------------|----|
|                                                                                   | $\text{P}_\text{A}$ | 210.8 | $^1J_{\text{P}_\text{A} \text{P}_\text{M}}$ | 365 | $^2J_{\text{P}_\text{A} \text{P}_\text{D}}$ | 26 |
|                                                                                   | $\text{P}_\text{D}$ | 150.6 | $^1J_{\text{P}_\text{A} \text{P}_\text{X}}$ | 390 | $^2J_{\text{P}_\text{D} \text{P}_\text{M}}$ | 14 |
|                                                                                   | $\text{P}_\text{E}$ | 125.4 | $^1J_{\text{P}_\text{D} \text{P}_\text{E}}$ | 415 | $^2J_{\text{P}_\text{E} \text{P}_\text{X}}$ | 11 |
|                                                                                   | $\text{P}_\text{M}$ | 53.9  | $^1J_{\text{P}_\text{D} \text{P}_\text{X}}$ | 370 | $^2J_{\text{P}_\text{M} \text{P}_\text{X}}$ | 16 |
|                                                                                   | $\text{P}_\text{X}$ | -25.6 | $^1J_{\text{P}_\text{E} \text{P}_\text{M}}$ | 516 |                                             |    |

**Table S6:**  $^{31}\text{P}\{^1\text{H}\}$  NMR data of coordination mode 1 of  $[\text{Ph}_2\text{As}][\text{OTf}]$  on **1** from the simulation (in  $\text{CD}_2\text{Cl}_2$  at 193 K).

|                     | $\delta$ (ppm) | $J$ (Hz)                                   |     |                                            |     |
|---------------------|----------------|--------------------------------------------|-----|--------------------------------------------|-----|
| $\text{P}_\text{A}$ | 57.7           | $^1J_{\text{P}_\text{A}\text{P}_\text{W}}$ | 259 | $^1J_{\text{P}_\text{B}\text{P}_\text{X}}$ | 218 |
| $\text{P}_\text{B}$ | 43.8           | $^1J_{\text{P}_\text{A}\text{P}_\text{X}}$ | 244 | $J_{\text{P}_\text{W}\text{P}_\text{X}}$   | 109 |
| $\text{P}_\text{W}$ | -237.0         | $^1J_{\text{P}_\text{B}\text{P}_\text{W}}$ | 214 | $^2J_{\text{P}_\text{A}\text{P}_\text{B}}$ | 24  |
| $\text{P}_\text{X}$ | -250.6         |                                            |     |                                            |     |

**Table S7:**  $^{31}\text{P}\{^1\text{H}\}$  NMR data of coordination mode 2 of  $[\text{Ph}_2\text{As}][\text{OTf}]$  on **1** from the simulation (in  $\text{CD}_2\text{Cl}_2$  at 193 K).

|                       | $\delta$ (ppm) | $J$ (Hz)                                     |     |
|-----------------------|----------------|----------------------------------------------|-----|
| $\text{P}_\text{A}$   | -10.9          | $^1J_{\text{P}_\text{A}\text{P}_\text{B}}$   | 125 |
| $\text{P}_\text{B}$   | -12.1          | $^1J_{\text{P}_\text{A}\text{P}_\text{X}_2}$ | 203 |
| $\text{P}_\text{X}_2$ | -274.9         | $^1J_{\text{P}_\text{B}\text{P}_\text{X}_2}$ | 256 |

## 1.2 NMR spectra of reactions of **1** with [Ph<sub>2</sub>P][OTf] at 193 K

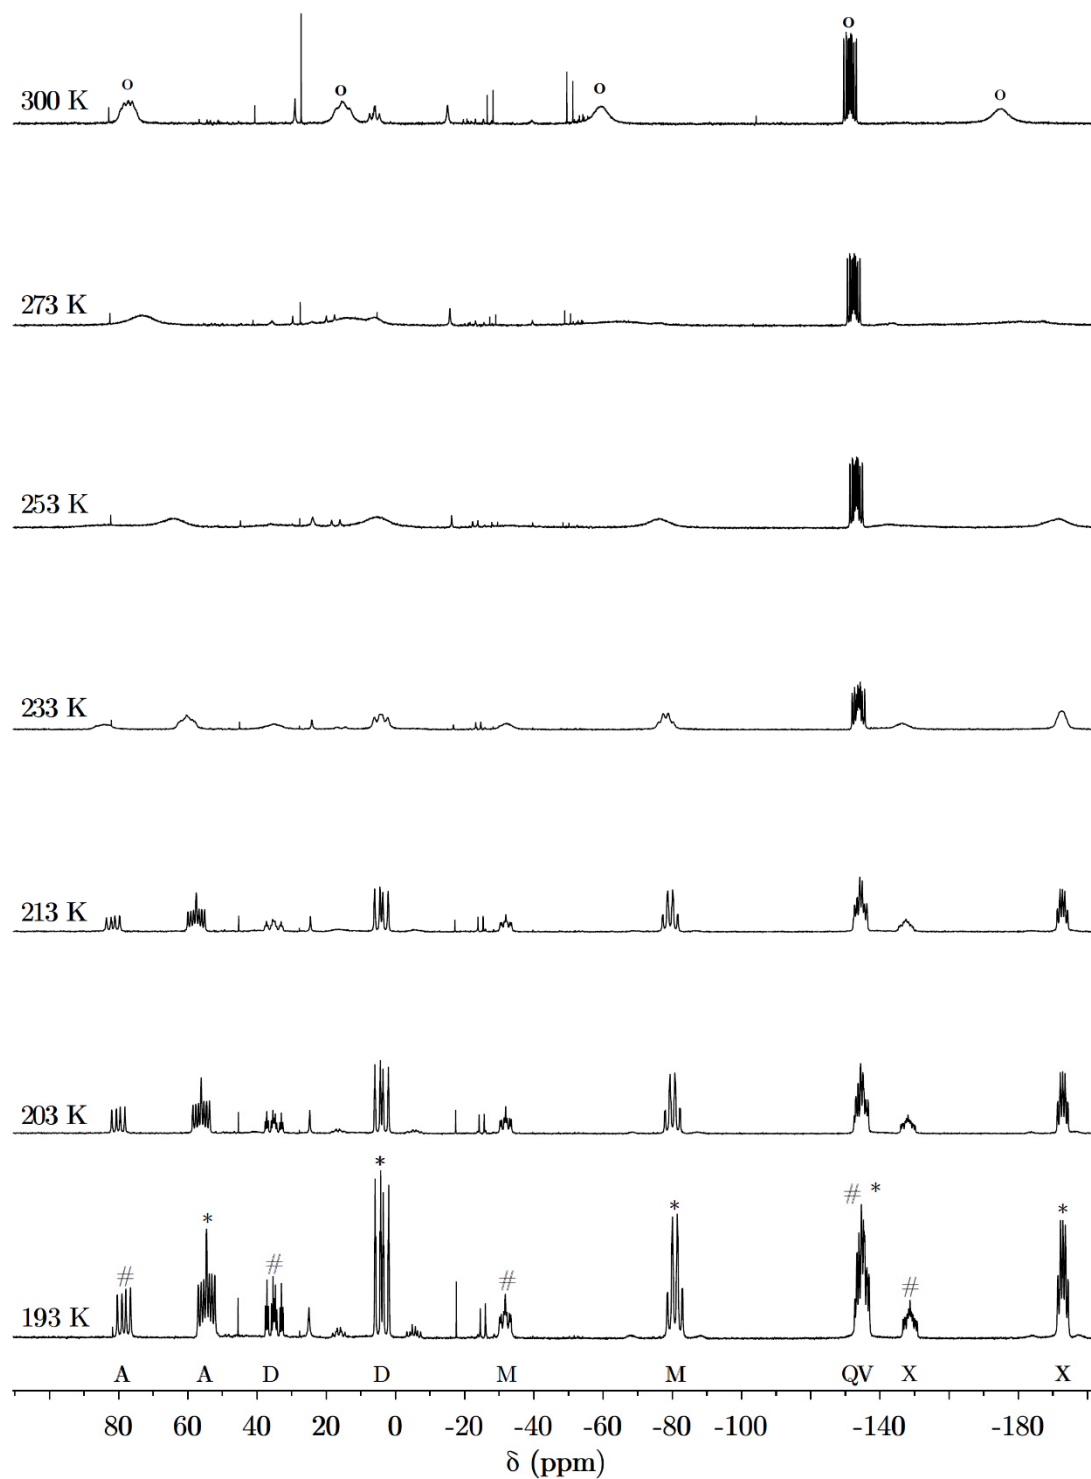

**Figure S1.** <sup>31</sup>P{<sup>1</sup>H} VT NMR spectrum in CD<sub>2</sub>Cl<sub>2</sub> from the reaction of **1** with [Ph<sub>2</sub>P][OTf]. The signals of compound **2a** are marked with \*, of compound **3a** with # and signals showing dynamic behaviour at room temperature with o.

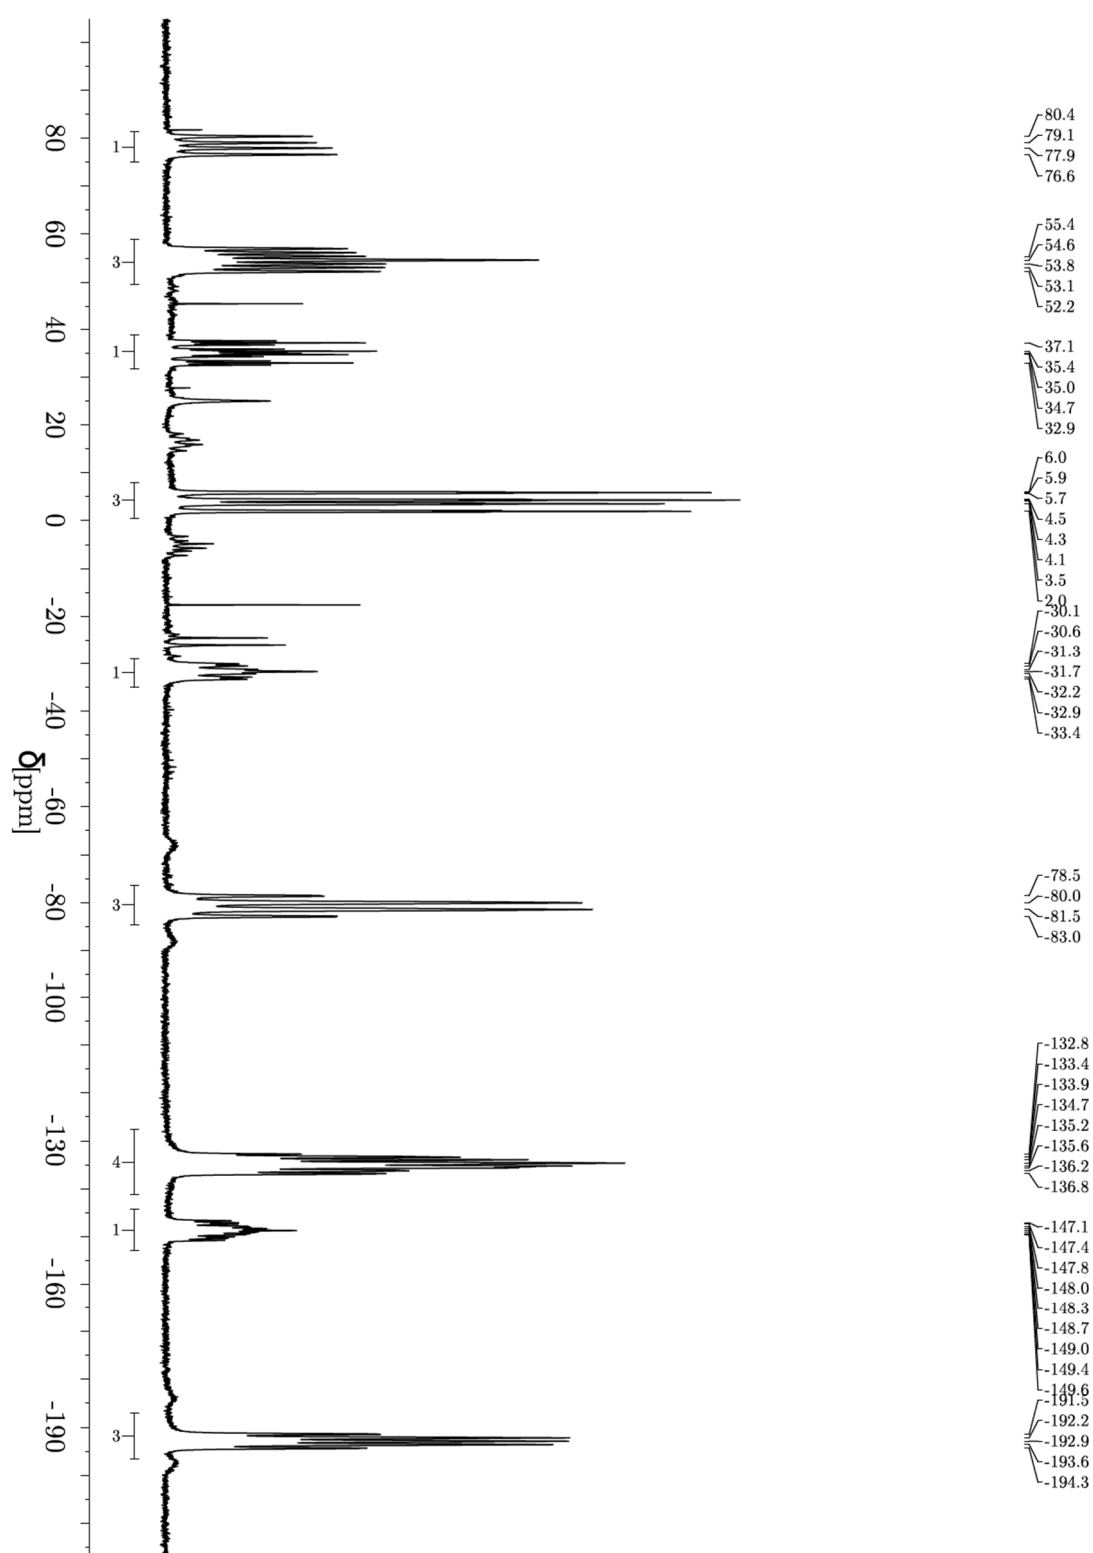

**Figure S2:**  $^{31}\text{P}\{^1\text{H}\}$  NMR spectrum (excerpt) at 193 K in  $\text{CD}_2\text{Cl}_2$  from the reaction of **1** with  $[\text{Ph}_2\text{P}][\text{OTf}]$  at 193 K with chemical shifts and integrals depicted in the spectrum.



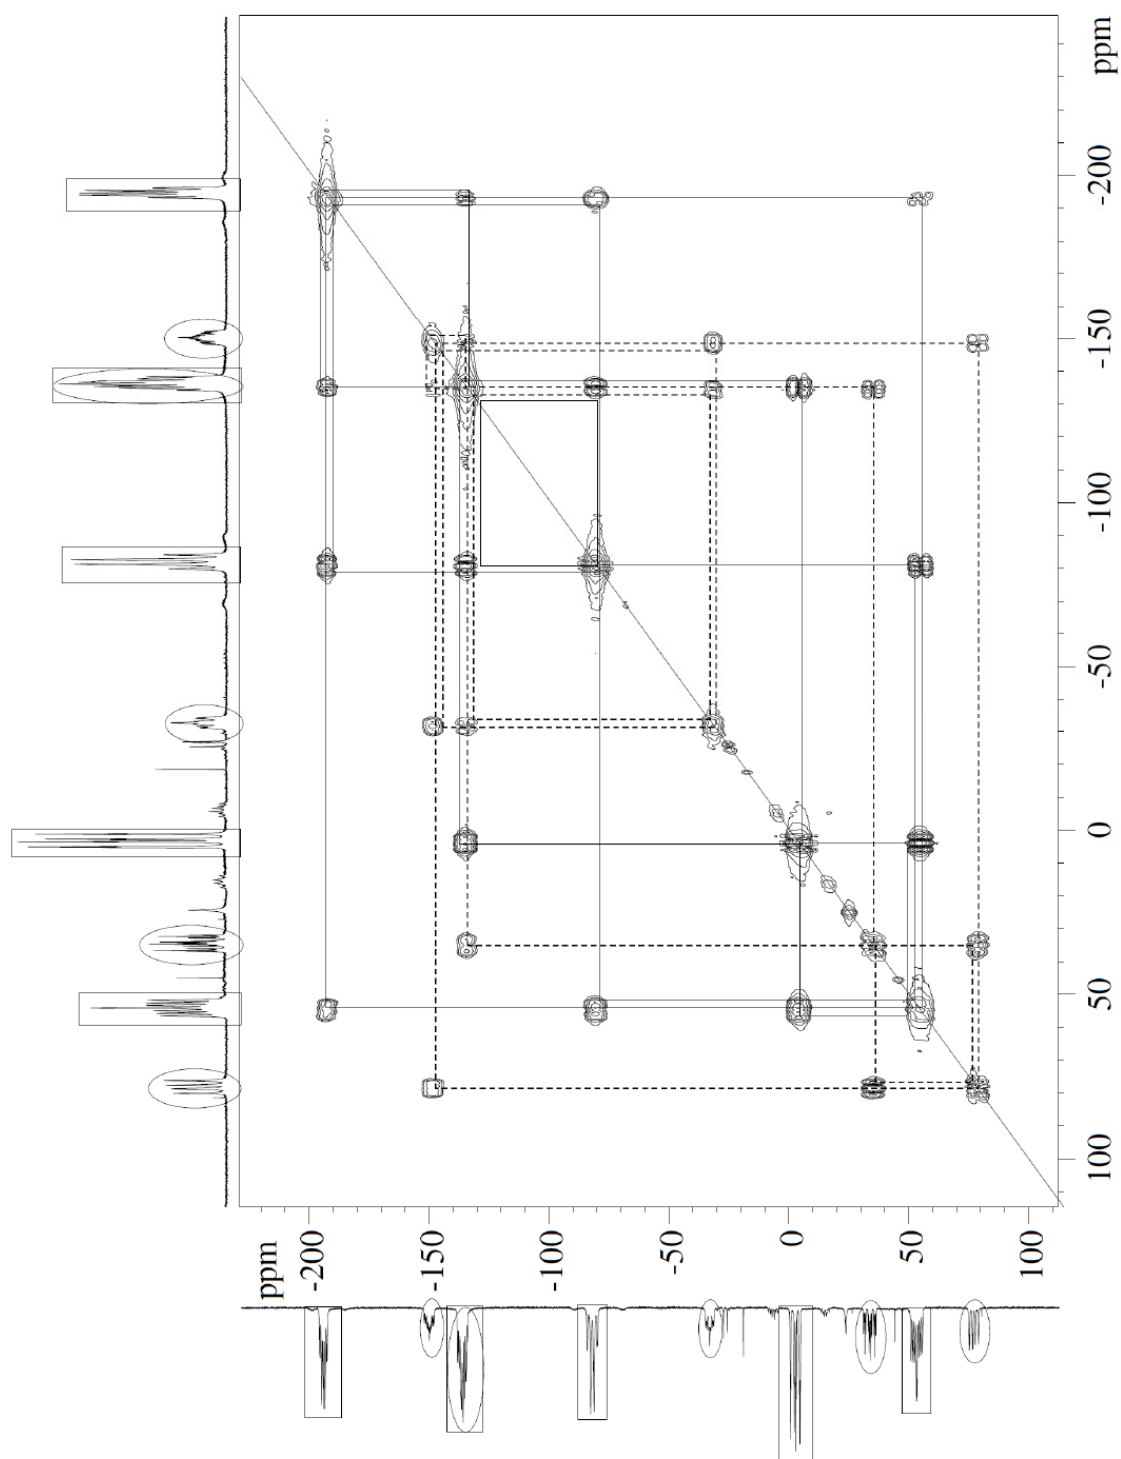

**Figure S4:**  $^{31}\text{P}$ - $^{31}\text{P}$  COSY NMR spectrum in  $\text{CD}_2\text{Cl}_2$  at 193 K of the product mixture from the reaction of  $[\text{Ph}_2\text{P}][\text{OTf}]$  with **1** at 193 K. Signals of **2a** are marked with rectangles, of **3a** with ellipses. Couplings in compound **2a** are drawn as rectangles with solid lines, couplings in **3a** with dashed lines. For easier understanding, the diagonal signals are connected via a solid line.

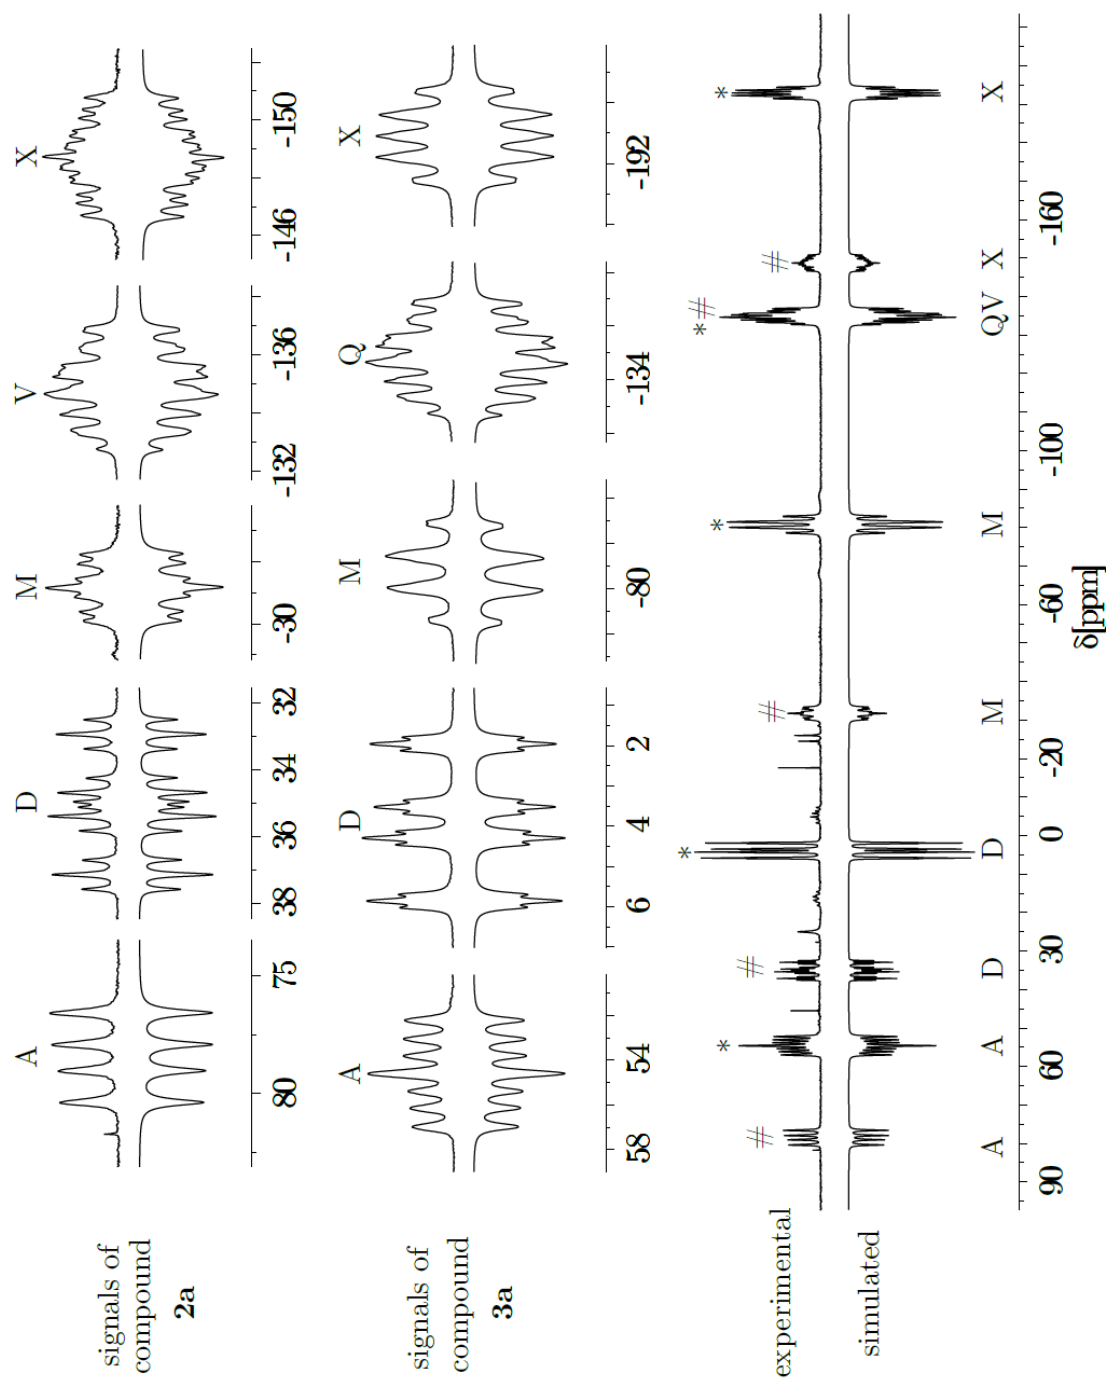

**Figure S5:** Simulation of the spin systems in the  $^{31}\text{P}\{^1\text{H}\}$  NMR spectrum of compounds **2a** and **3**. The multiplets of compound **2a** are marked with \*, the multiplets of compound **3a** with #. The multiplet Q/V is the result of two overlapping multiplets from the two different spin systems. The simulation of the spin system is shown inverted.



### 1.3 NMR spectra of reactions of **1** with [Me<sub>2</sub>P][OTf] at 193 K

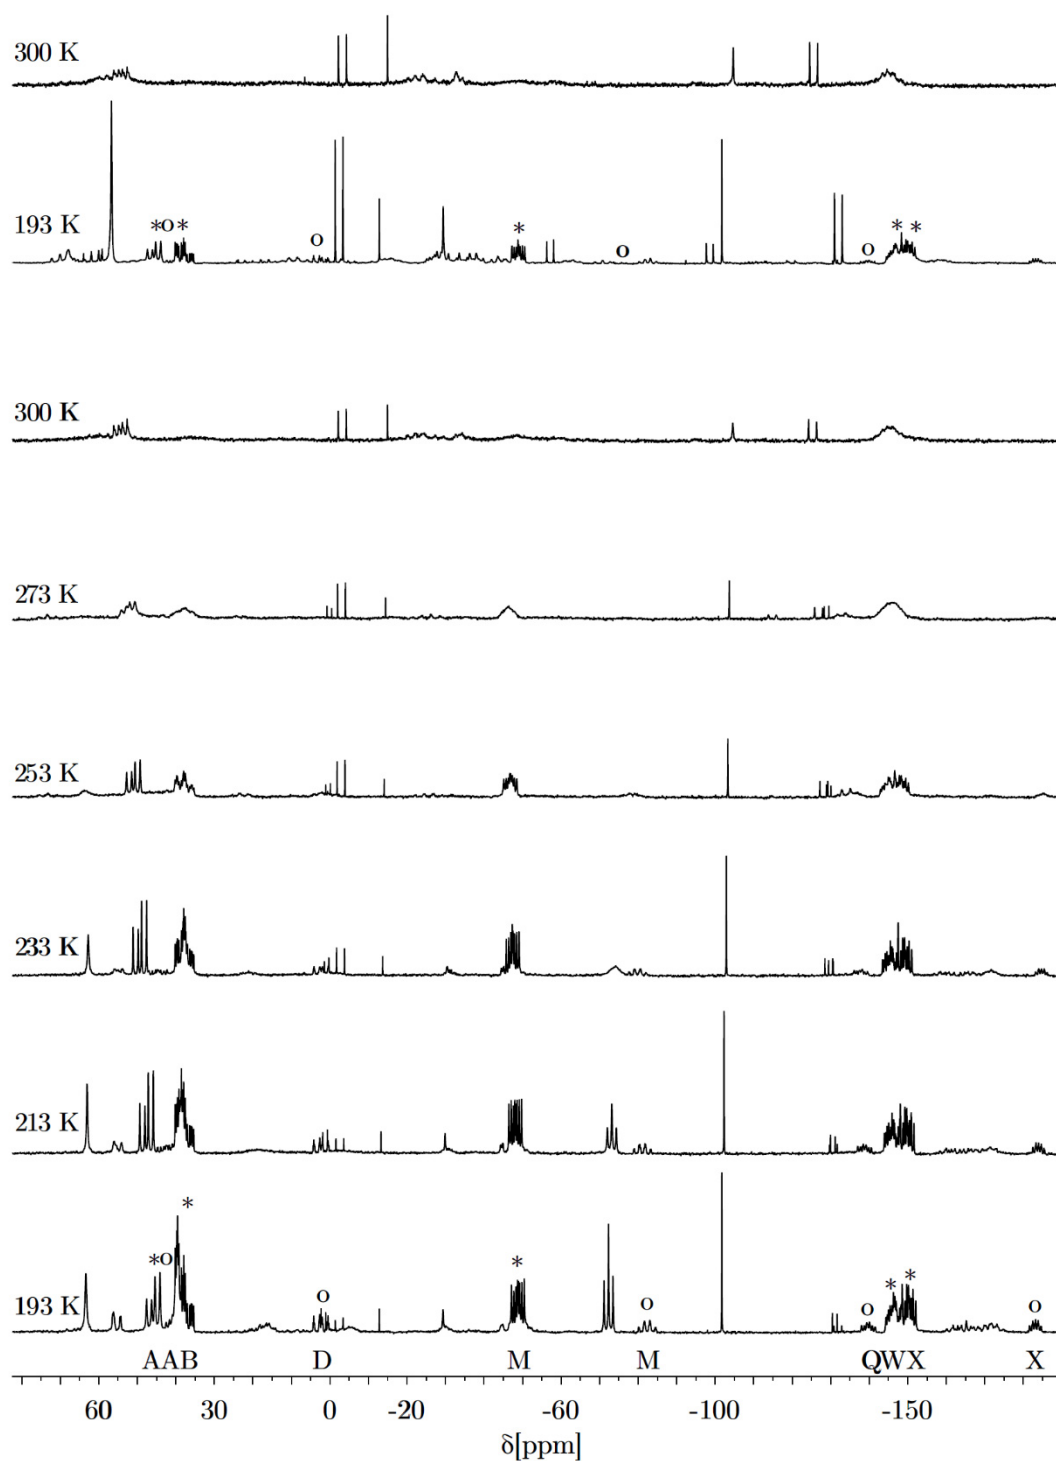

**Figure S6:**  $^{31}\text{P}\{^1\text{H}\}$  VT NMR spectrum in  $\text{CD}_2\text{Cl}_2$  of the reaction of **1** with in situ generated  $[\text{Me}_2\text{P}][\text{OTf}]$ . The signals of **2b** are marked with \*, the signals of **3b** with o.

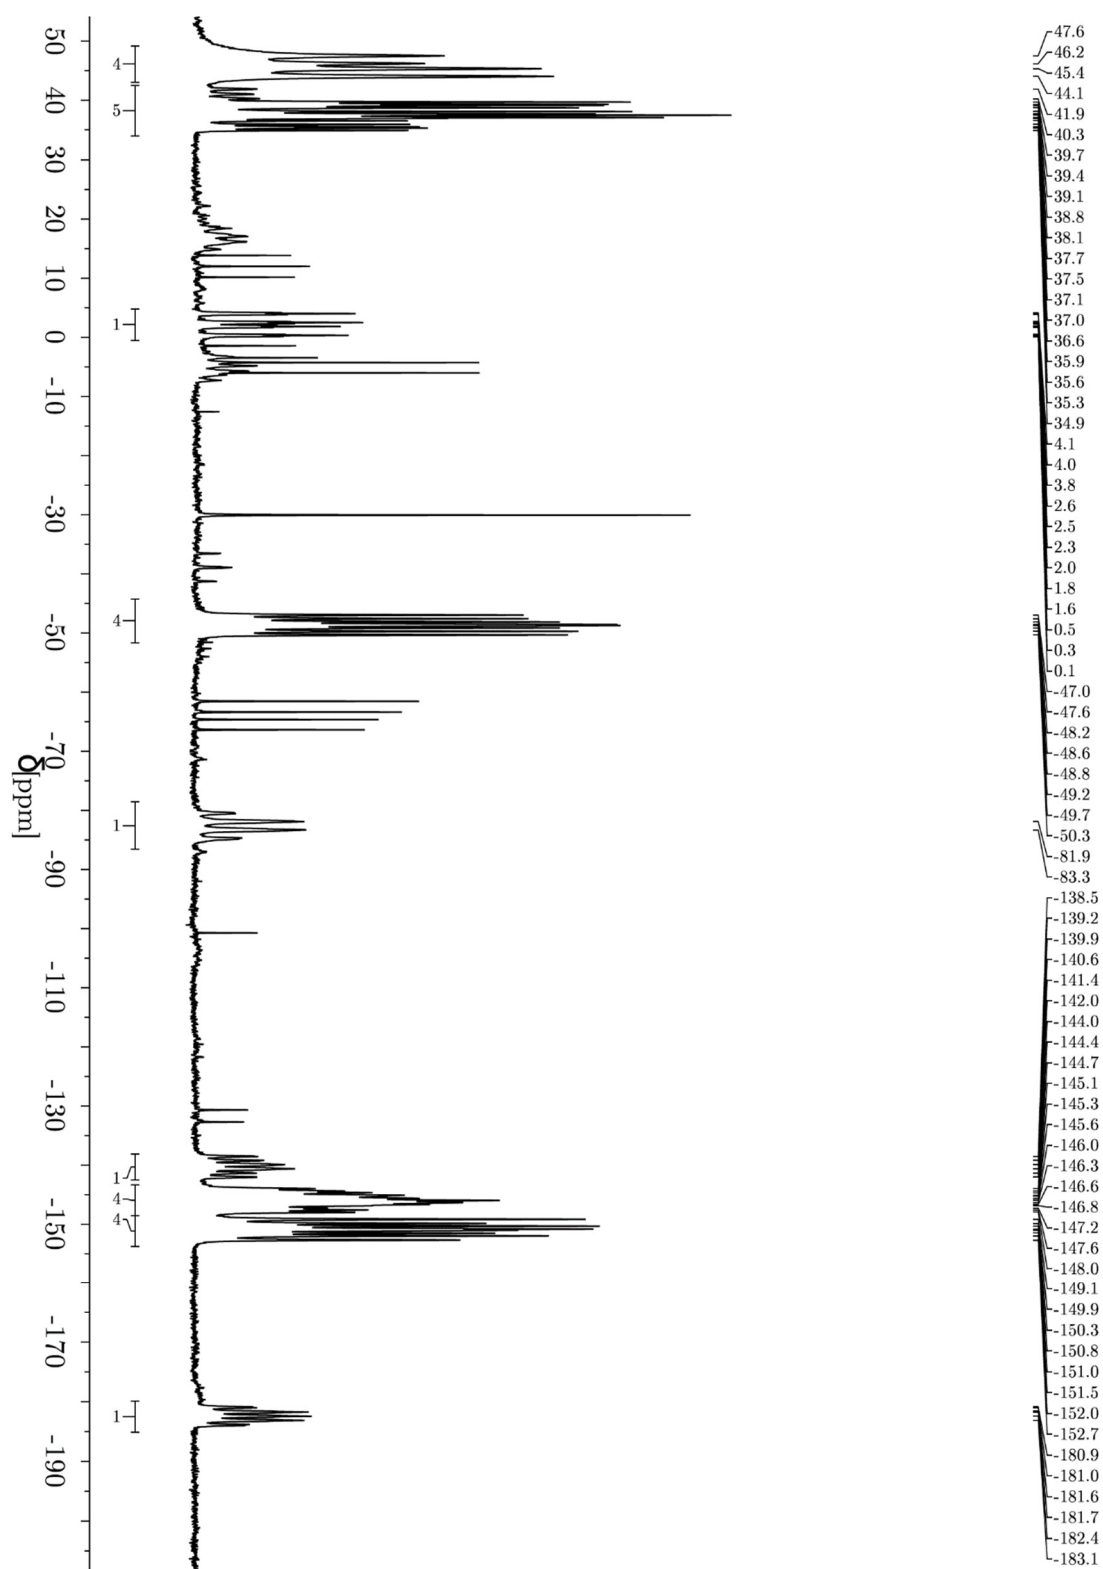

**Figure S7:**  $^{31}\text{P}\{^1\text{H}\}$  NMR spectrum (excerpt) in  $\text{CD}_2\text{Cl}_2$  from the reaction of **1** with  $[\text{Me}_2\text{P}][\text{OTf}]$  at 193 K with chemical shifts and integrals depicted in the spectrum.

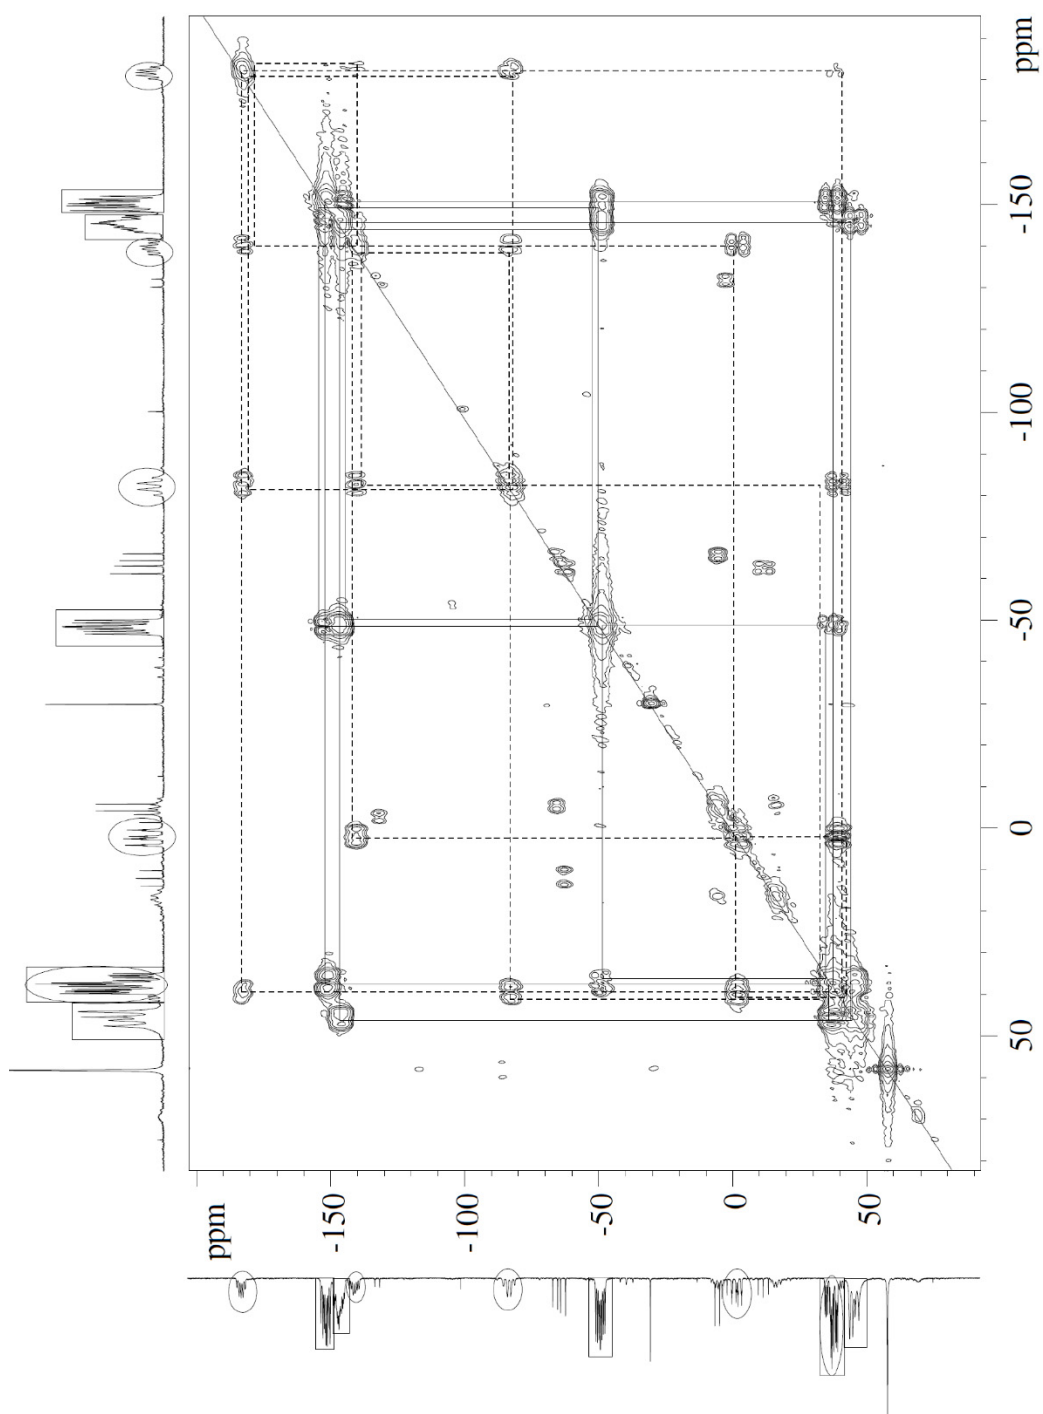

**Figure S8:**  $^{31}\text{P}$ - $^{31}\text{P}$  COSY NMR spectrum in  $\text{CD}_2\text{Cl}_2$  at 193 K of the product mix from the reaction of  $[\text{Me}_2\text{P}][\text{OTf}]$  with **1** at 193 K. Signals of **2b** are marked with rectangles, signals of **3b** with ellipses. Couplings in compound **2b** are drawn as rectangles with solid lines, couplings in compound **3b** with dashed lines. For easier understanding, the diagonal signals are connected via a solid line. The couplings between multiplets A and B as well as between W and X of compound **3b** are not resolved in this figure since they appear in close proximity to each other.

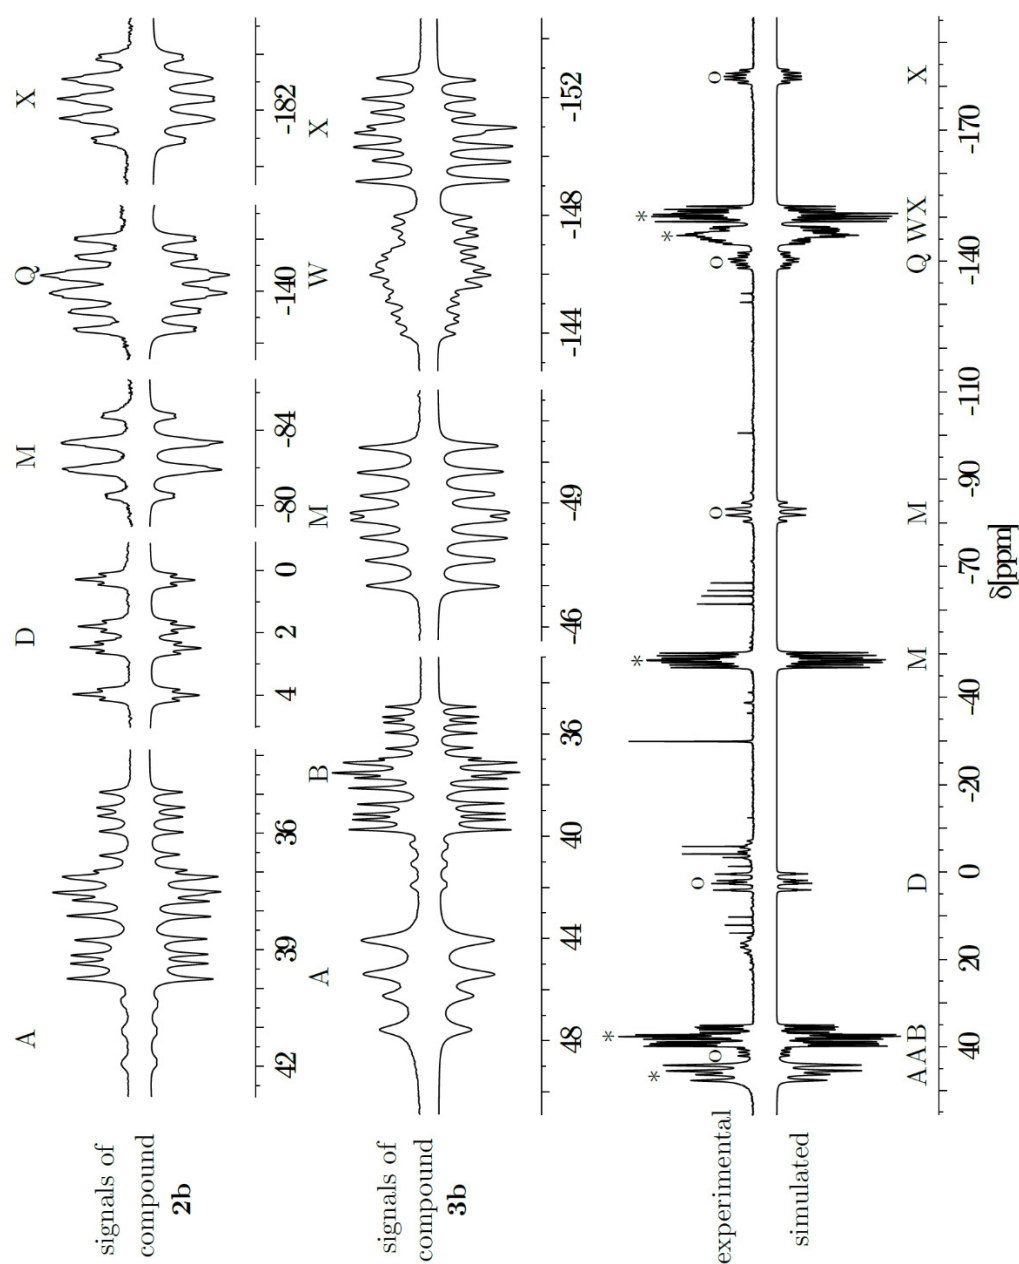

**Figure S9:** Simulation of the spin systems in the  $^{31}\text{P}\{^1\text{H}\}$  NMR spectrum of compounds **2b** and **3b**. The multiplets of compound **2b** are marked with \*, the multiplets of **3b** with o. The signal at 40 ppm is the result of overlapping multiplets B of compound **2b** and A of compound **3b**. The simulation of the spin system is shown inverted. The simulated multiplets W and X of **2b** differ from the signals in the real spectrum in intensity, which can be explained by overlaps with signals from minor products not accounted for in the iterative fit. The coupling pattern of the simulated multiplet does not differ from the real one.

## 1.4 NMR spectra of the reaction of **1** with in situ generated $[\text{Ph}_2\text{P}][\text{PF}_6]$ at room temperature

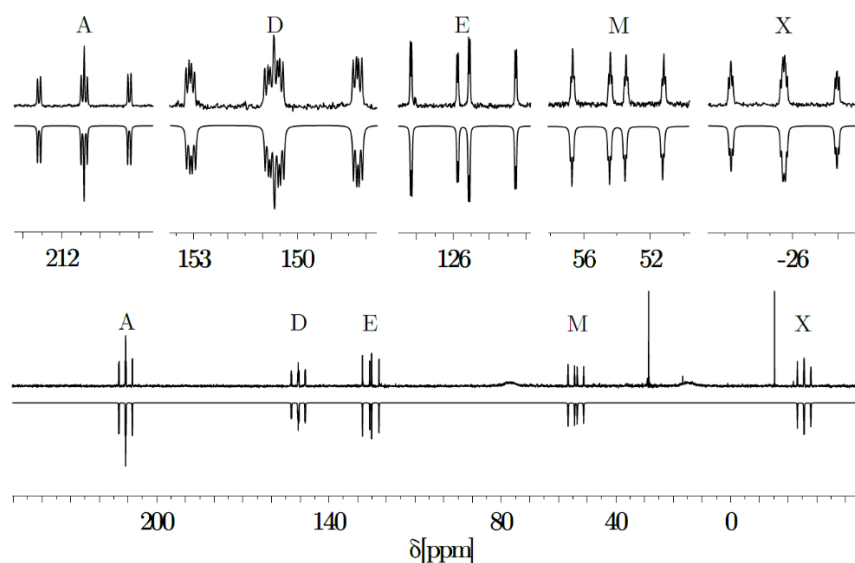

**Figure S10:** Simulation (inverted) of the  $^{31}\text{P}\{^1\text{H}\}$  NMR spectrum of **4**.

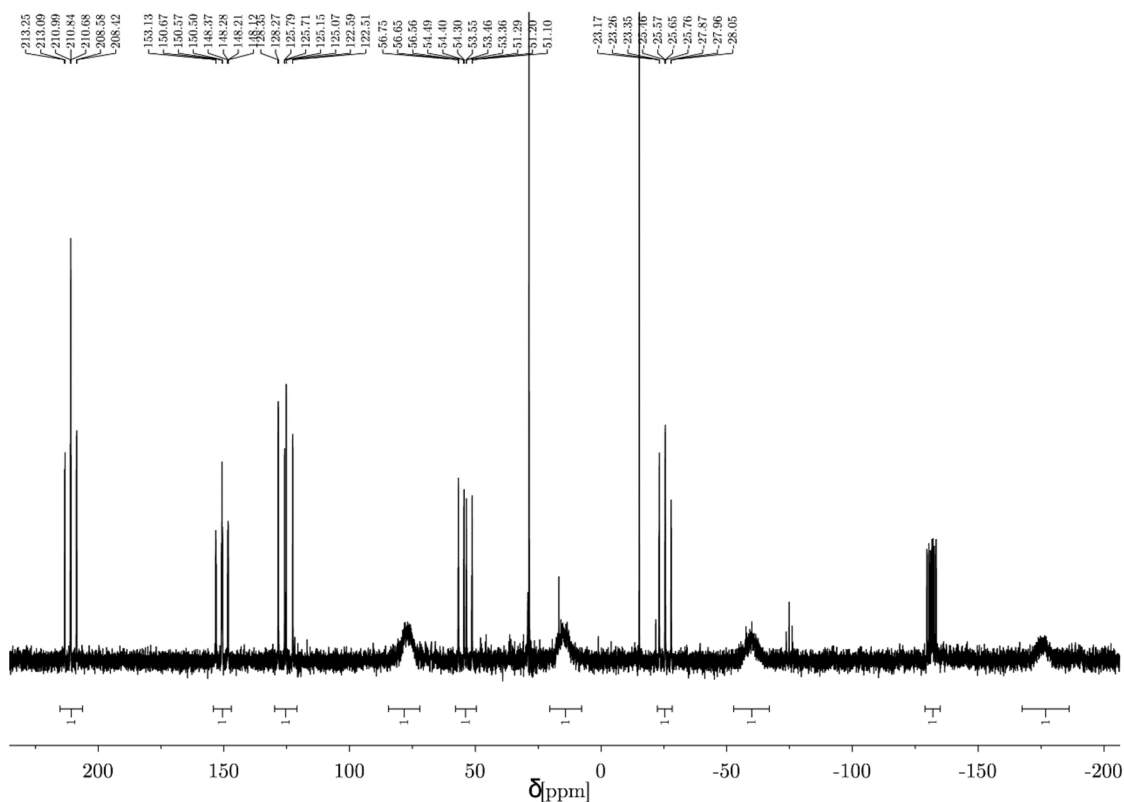

**Figure S11:**  $^{31}\text{P}\{^1\text{H}\}$  NMR spectrum (excerpt) in  $\text{CD}_2\text{Cl}_2$  from the reaction of **1** with  $[\text{Ph}_2\text{P}][\text{PF}_6]$  at room temperature with chemical shifts and integrals depicted in the spectrum.

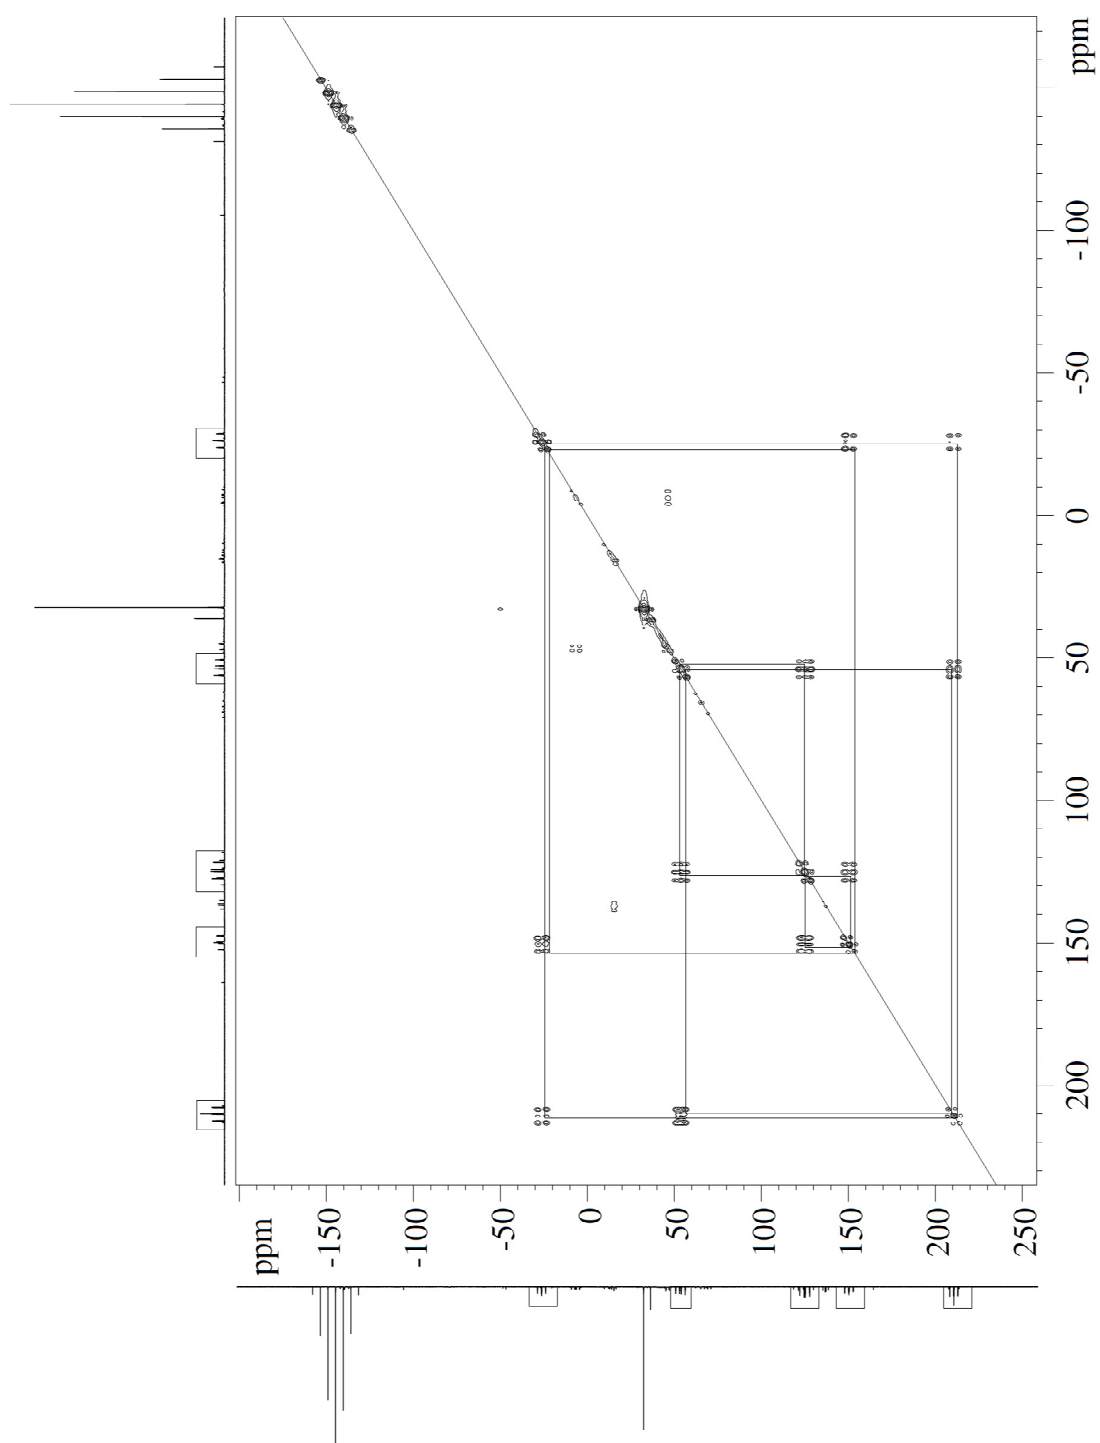

**Figure S12:**  $^{31}\text{P}$ - $^{31}\text{P}$  COSY NMR spectrum of **4** at room temperature. Couplings are marked with rectangles for easier understanding.

### 1.5 NMR spectra of the reaction of **1** with in situ generated $[\text{Ph}_2\text{As}][\text{OTf}]$ .

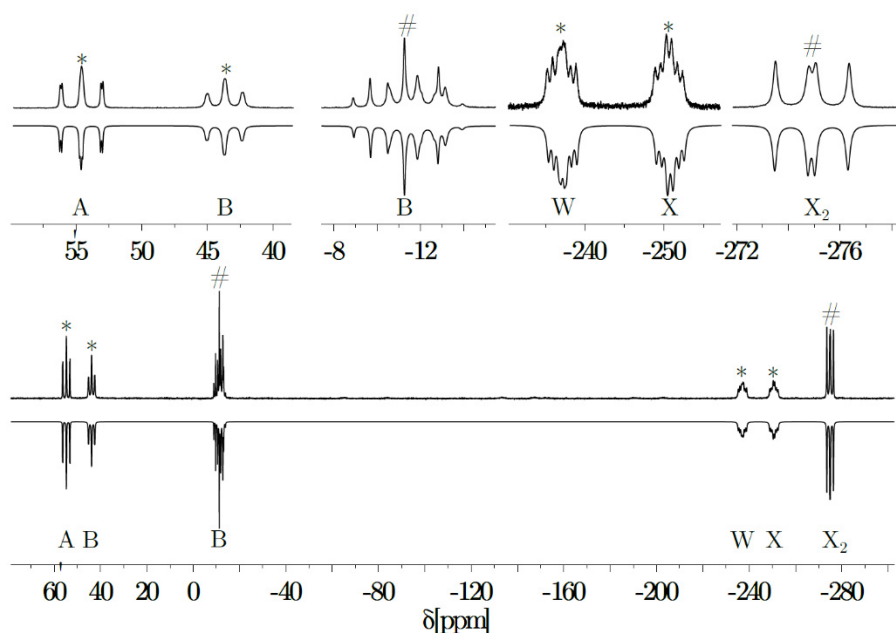

**Figure S13:** Simulation of the  $^{31}\text{P}\{^1\text{H}\}$  NMR spectrum of coordination mode 1 and 2 of  $[\text{Ph}_2\text{As}][\text{OTf}]$  on **1**. Signals of coordination mode 1 are marked with \*, signals of coordination mode 2 with #. The simulated spectrum is shown inverted.

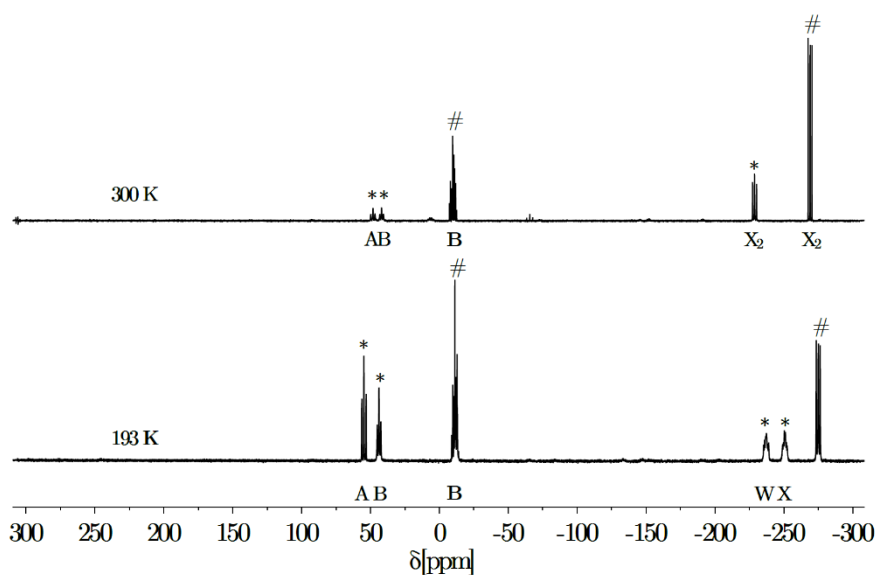

**Figure S14:** Comparison of the  $^{31}\text{P}\{^1\text{H}\}$  NMR spectrum of coordination mode 1 and 2 of  $[\text{Ph}_2\text{As}][\text{OTf}]$  on **1** at 193 K and room temperature. Signals of coordination mode 1 are marked with \*, signals of coordination mode 2 with #.

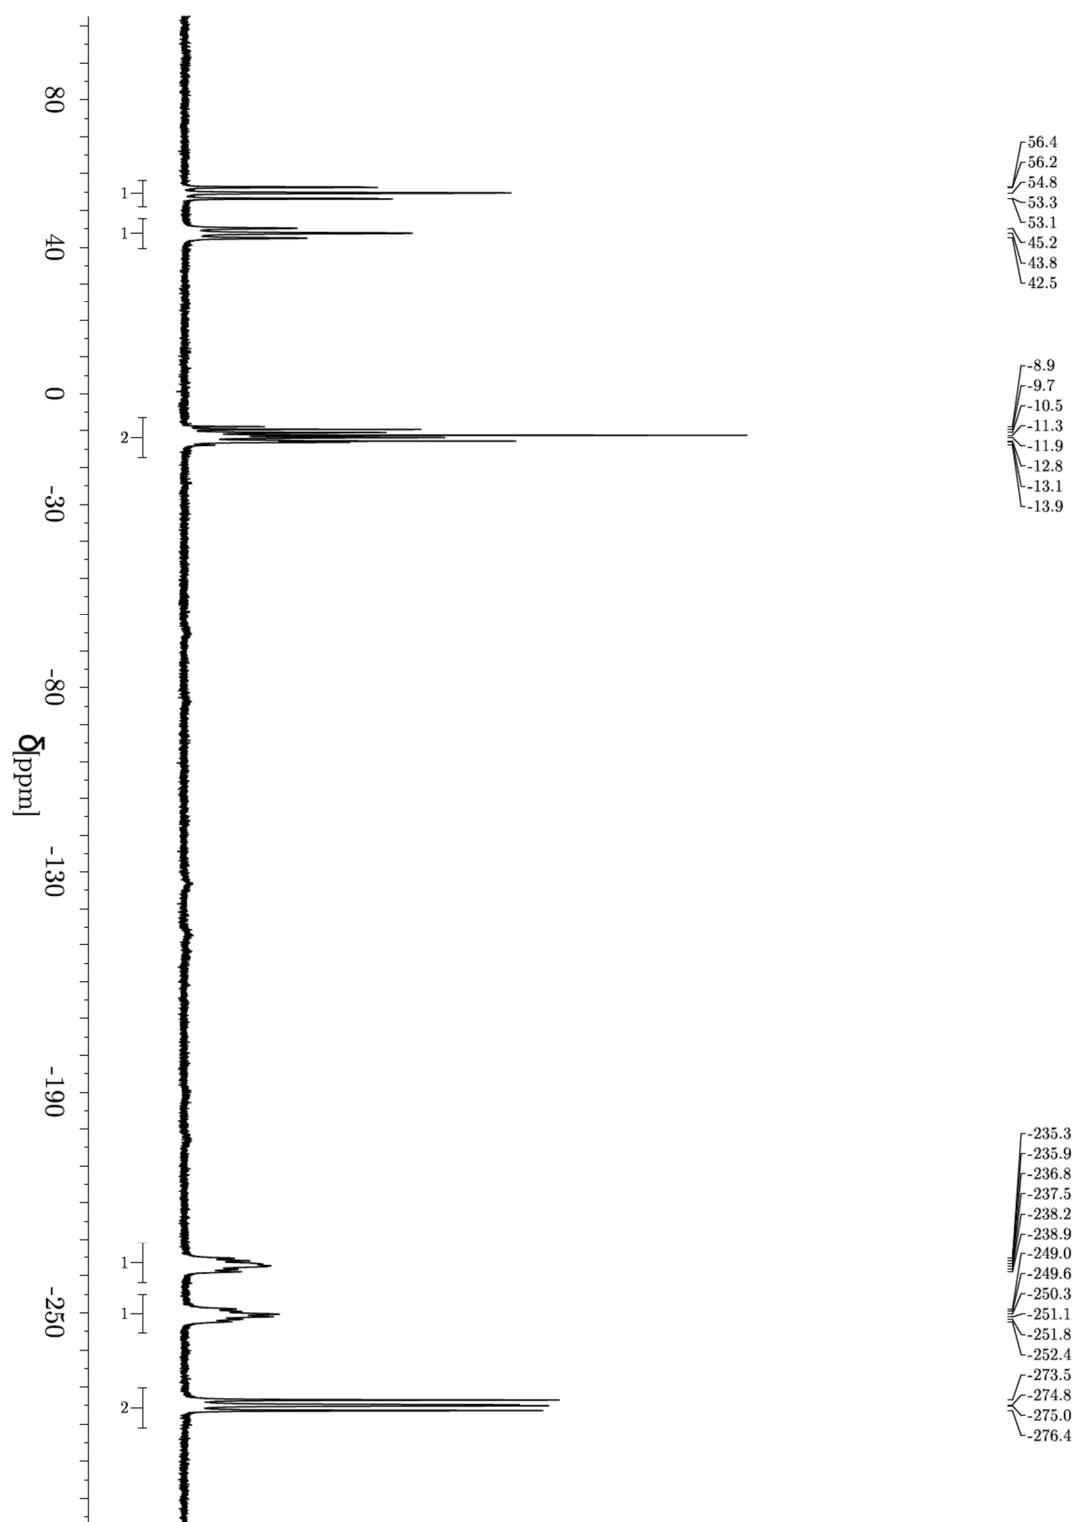

**Figure S15:**  $^{31}\text{P}\{^1\text{H}\}$  NMR spectrum (excerpt) in  $\text{CD}_2\text{Cl}_2$  right after warming to room temperature from the reaction of **1** with  $[\text{Ph}_2\text{As}][\text{OTf}]$  at 193 K with chemical shifts and integrals depicted in the spectrum.



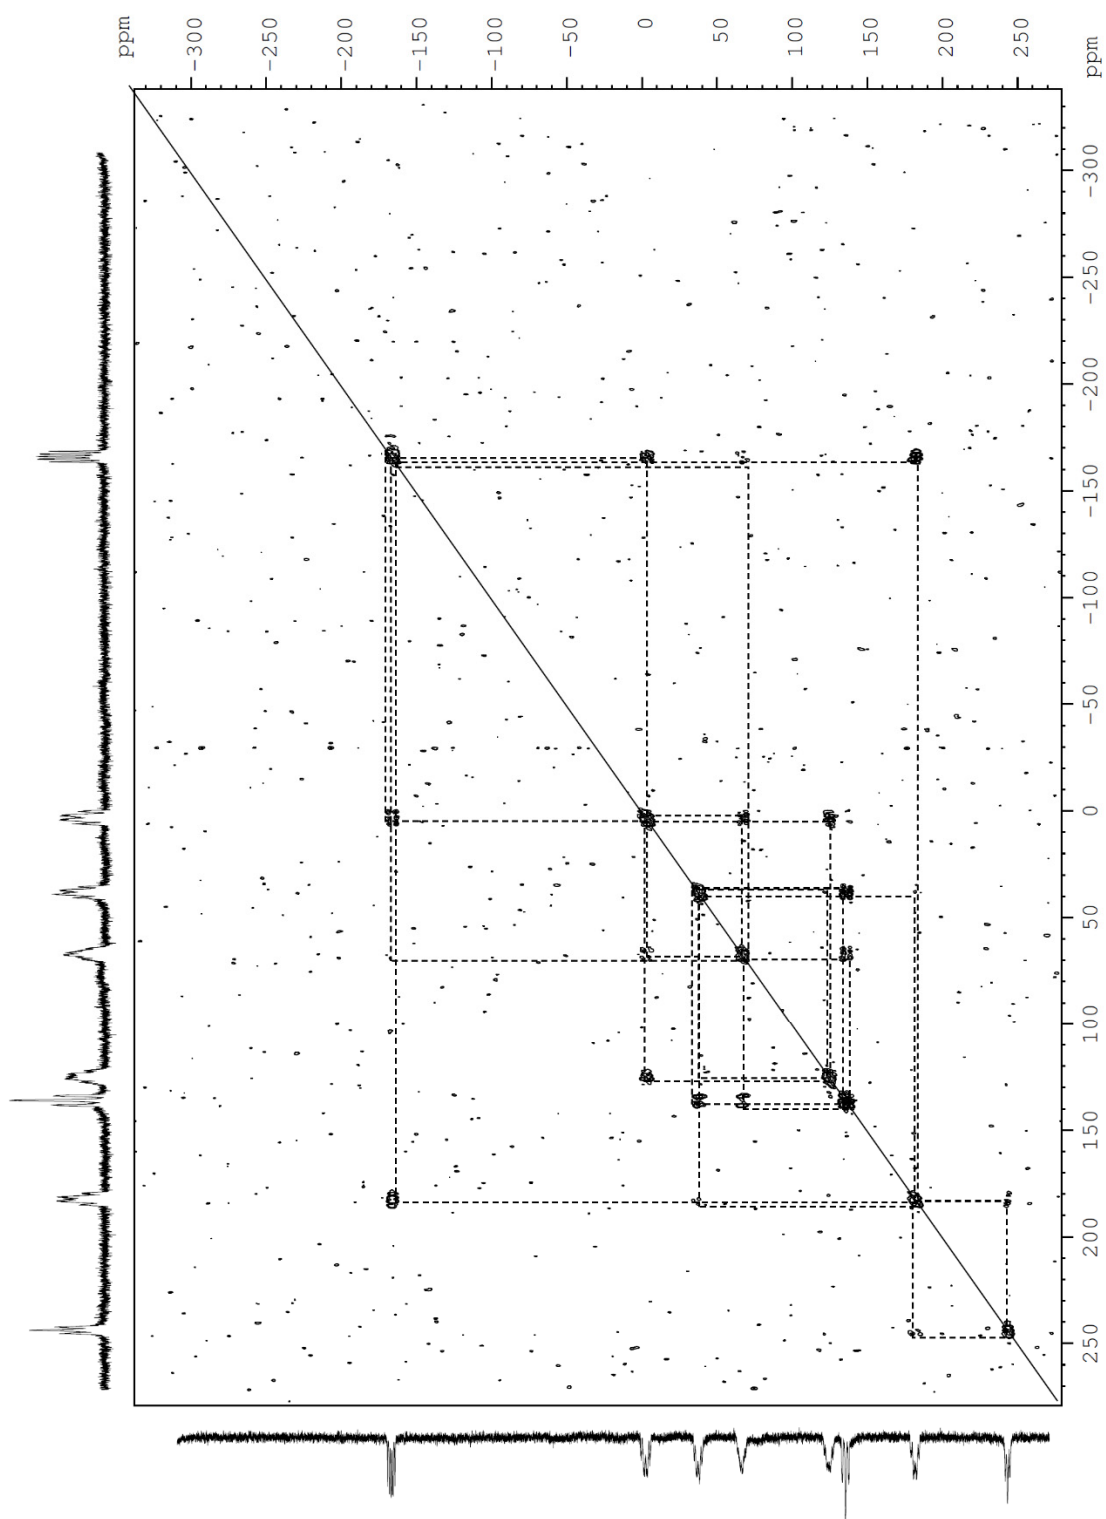

**Figure S16:**  $^{31}\text{P}$ - $^{31}\text{P}$  COSY NMR spectrum in  $\text{CD}_2\text{Cl}_2$  at 273 K of **5**. For easier understanding, the diagonal signals are connected via a solid line and the couplings between multiplets are marked with dotted rectangles. Due to the dynamic behaviour some couplings are not or badly resolved.

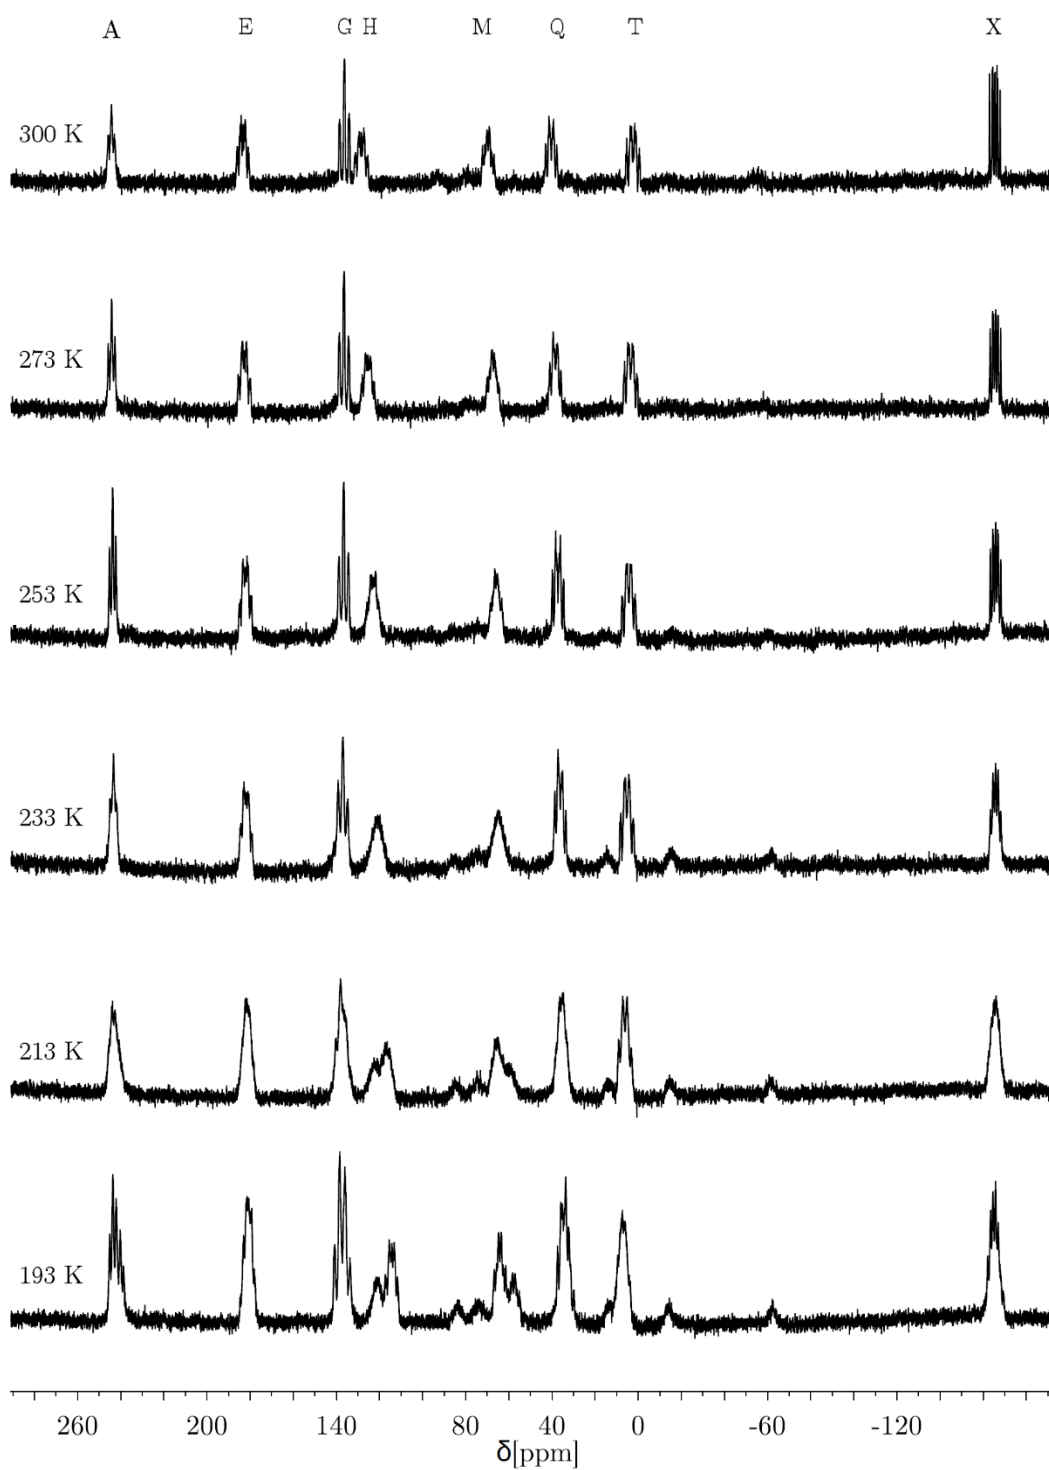

**Figure S17:**  $^{31}\text{P}$  VT NMR spectrum in  $\text{CD}_2\text{Cl}_2$  of crystals of **5**. The splitting of H and M as well as the beginning splitting of the other multiplets of the spin system can be explained that freezing dynamic processes, inhibiting free rotation of the  $[\text{Cp}^{\text{III}}\text{Fe}(\text{CO})_2]$  fragments.

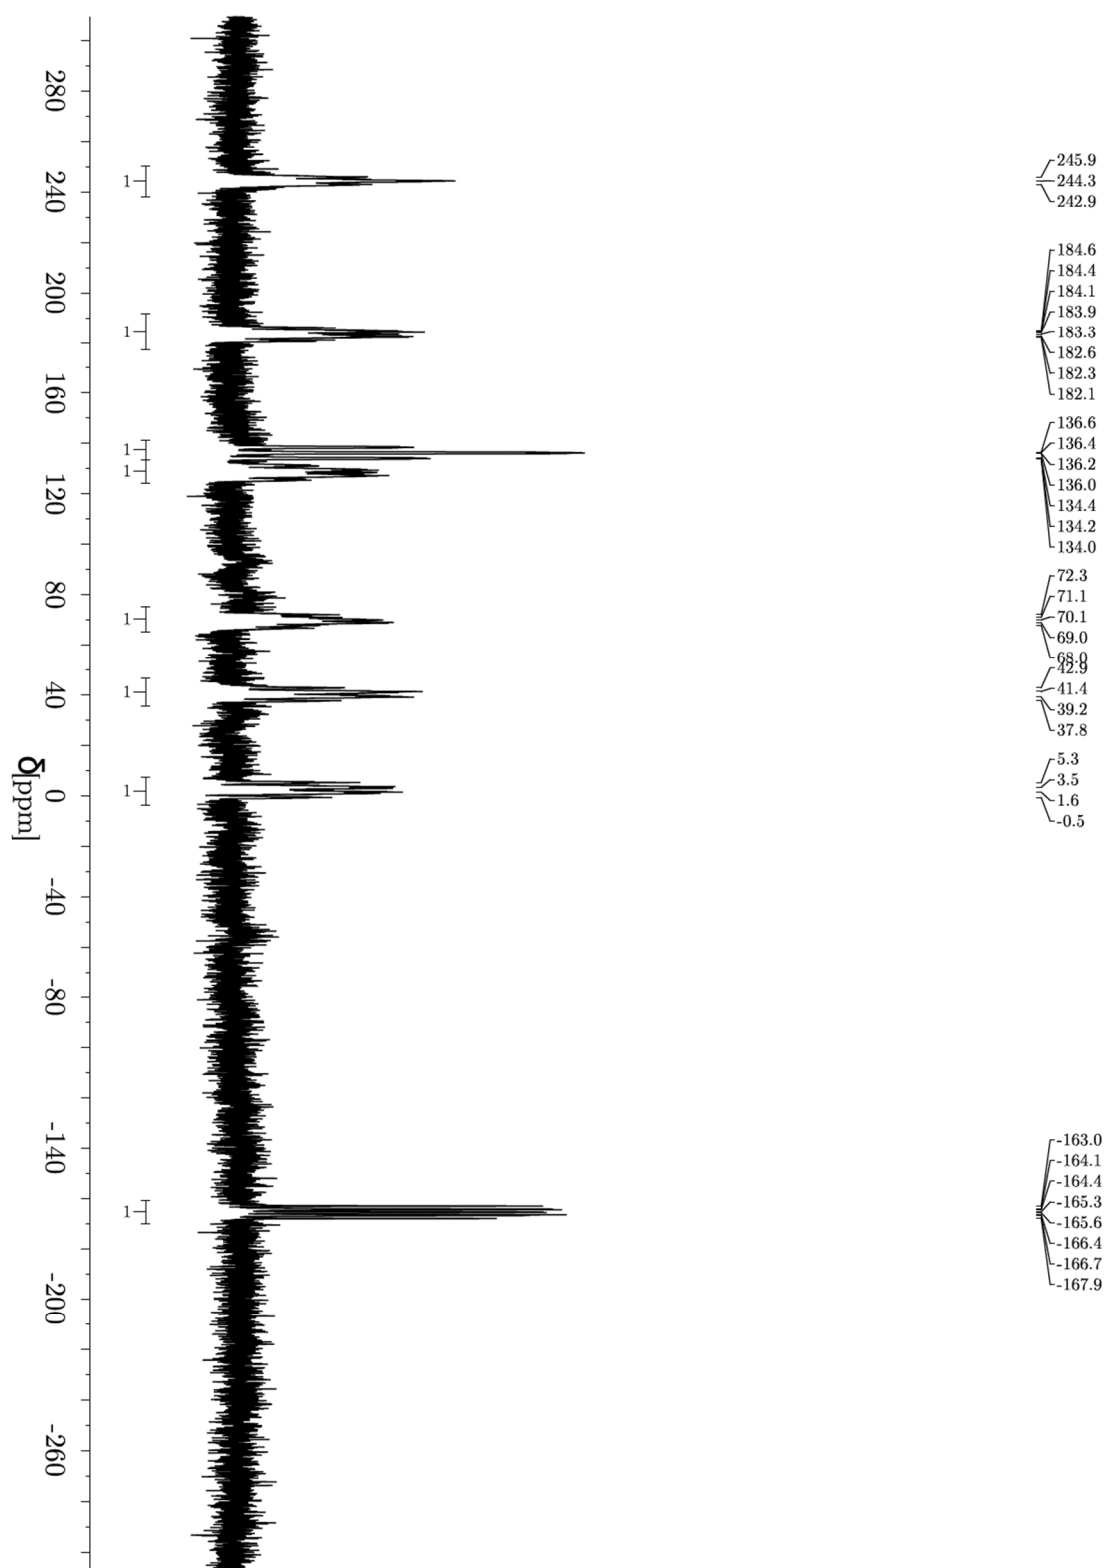

**Figure S18:**  $^{31}\text{P}$  NMR spectrum of **5** in  $\text{CD}_2\text{Cl}_2$  at room temperature with chemical shifts and integrals depicted in the spectrum.

**Table S8:**  $^{31}\text{P}$  NMR data of **5**: ( $\text{CD}_2\text{Cl}_2$ ; 273 K) with assignment of the individual phosphorus atoms:

|                     | $\delta$ (ppm) | Coupling with                                               |
|---------------------|----------------|-------------------------------------------------------------|
| $\text{P}_\text{A}$ | 244.3          | $\text{P}_\text{E}$                                         |
| $\text{P}_\text{E}$ | 183.3          | $\text{P}_\text{A}$ $\text{P}_\text{Q}$ $\text{P}_\text{X}$ |
| $\text{P}_\text{G}$ | 136.3          | $\text{P}_\text{Q}$ $\text{P}_\text{M}$                     |
| $\text{P}_\text{H}$ | 128.4          | $\text{P}_\text{T}$ $\text{P}_\text{Q}$                     |
| $\text{P}_\text{M}$ | 69.5           | $\text{P}_\text{T}$ $\text{P}_\text{G}$ $\text{P}_\text{X}$ |
| $\text{P}_\text{Q}$ | 40.3           | $\text{P}_\text{E}$ $\text{P}_\text{G}$ $\text{P}_\text{H}$ |
| $\text{P}_\text{T}$ | 2.5            | $\text{P}_\text{H}$ $\text{P}_\text{M}$ $\text{P}_\text{X}$ |
| $\text{P}_\text{X}$ | -165.4         | $\text{P}_\text{E}$ $\text{P}_\text{M}$ $\text{P}_\text{T}$ |

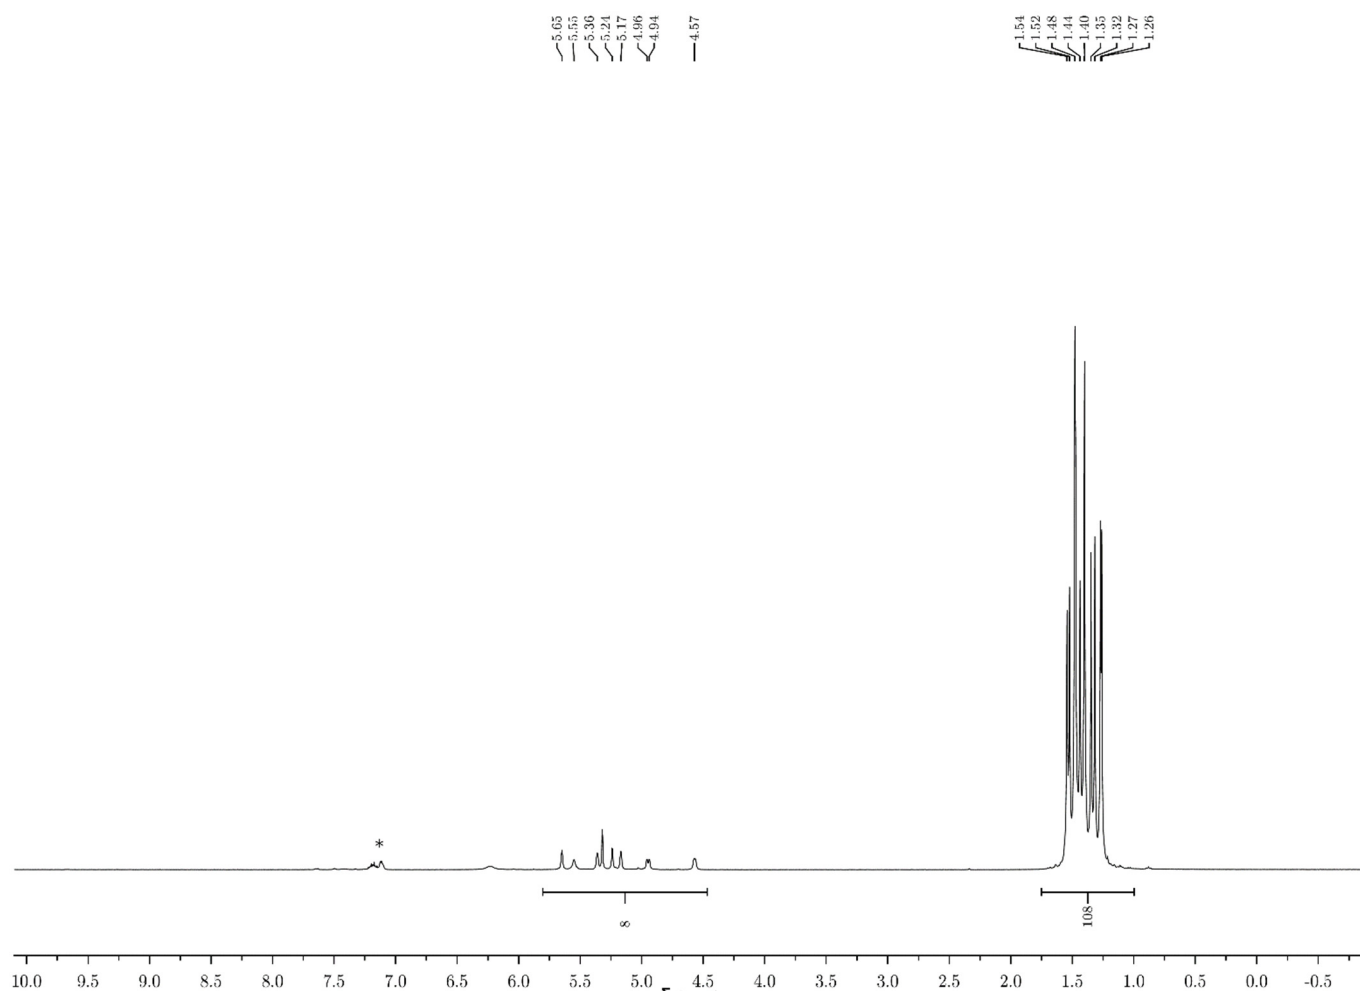

**Figure S19:**  $^1\text{H}$  NMR spectrum of **5** in  $\text{CD}_2\text{Cl}_2$  at room temperature with chemical shifts and integrals depicted in the spectrum. Signals from residual o-DFB are marked with \*.

## 2 Crystallographic details

CIF files with comprehensive information on the details of the diffraction experiments and full tables of bond lengths and angles for **3a**, **4**, and **5** are deposited in Cambridge Crystallographic Data Centre under the deposition codes CCDC-2085799, CCDC-2085801, and CCDC-2085801, respectively.

### 2.1 Crystallographic details on **3a**

Compound **3a** was crystallized in very small amounts from an ortho-difluorobenzene pentane mixture by storing at 243 K for one month. A suitable clear red block-shaped crystal of **3a** with dimensions  $0.07 \times 0.05 \times 0.04$  mm<sup>3</sup> was selected and mounted on a GV1000, TitanS2 diffractometer. The crystal was kept at a steady  $T = 123.00(10)$  K during data collection. The structure was solved with the ShelXT 2018/2 [1] solution program using iterative methods and by using Olex2 1.3-alpha [2] as the graphical interface. The model was refined with ShelXL 2018/3 [3] using full matrix least squares minimisation on  $F^2$ . Two of the tert-butyl groups on the Cp''' on Fe1 were disordered due to rotation.

### 2.2 Crystallographic details on **4**

Compound **4** was crystallized in very small amounts from a 1:1 toluene/diethylether mixture at 4 °C. The needle-shaped crystals of **4** were significantly undergrown, showing no scattering on the laboratory diffractometer. Therefore, we decided to perform the diffraction study using synchrotron radiation. The diffraction data for **4** were collected on the P11 beamline at PETRAIII accelerator at DESY, Hamburg, Germany [4]. The microscopic needle crystal was mounted on the 100  $\mu$ m MiTeGen® loop in the drop of the mineral oil. The X-ray beam ( $E = 18$  keV,  $\lambda = 0.6888$  Å) was preliminary focused to  $200 \times 200$   $\mu$ m with the focusing bendable KB mirror system [4] and then additionally collimated to 50  $\mu$ m. As a result, the background was significantly reduced resulting in quite appropriate  $I_{hkl}/\sigma$  values (average 5 before merging, 14 after the merging for the data up to 0.834 Å). Total 1800 frames were collected using 0.2° frames in the shutterless mode using Pilatus 6M detector. The CrysAlisPro software was used to extract the reflection intensities from the set of the frames. After the data finalization, the reflections up to  $d_{min.} = 0.83$  Å were used for the refinement. The structure was solved using SHELXT [1] program and refined in the anisotropic approximation using SHELX2018/3 [3] program. Both solvent molecules are disordered and therefore some restraints were applied in the refinement.

### 2.3 Crystallographic details on **5**

Compound **5** was crystallized from an ortho-difluorobenzene pentane mixture at room temperature. A suitable clear orange plate-shaped crystal of **5** with dimensions  $0.26 \times 0.17 \times 0.13 \text{ mm}^3$  was selected and mounted on a GV1000, TitanS2 diffractometer. The crystal was kept at a steady  $T = 133.00(10) \text{ K}$  during data collection, since we noticed loss of crystallinity at lower temperatures. The structure was solved with the ShelXT [1] solution program using dual methods and by using Olex2 1.5-alpha [2] as the graphical interface. The model was refined with ShelXL 2018/3 [3] using full matrix least squares minimisation on  $F^2$ . A solvent mask was calculated and 121 electrons were found in a volume of  $493 \text{ \AA}^3$  in 1 void per unit cell. This is consistent with the presence of  $1[\text{C}_6\text{H}_4\text{F}_2]$  per asymmetric unit which account for 116 electrons per unit cell. One triflate anion was disordered.

## 2.4 Crystallographic data

**Table S9:** Crystallographic data for **3a**, **4** and **5**:

| Compound                              | <b>3a</b>                                                                                    | <b>4</b>                                                                                         | <b>5</b>                                                                                                       |
|---------------------------------------|----------------------------------------------------------------------------------------------|--------------------------------------------------------------------------------------------------|----------------------------------------------------------------------------------------------------------------|
| Formula                               | C <sub>50</sub> H <sub>68</sub> F <sub>6</sub> Fe <sub>2</sub> O <sub>4</sub> P <sub>6</sub> | C <sub>53.5</sub> H <sub>77</sub> F <sub>6</sub> Fe <sub>2</sub> O <sub>2.5</sub> P <sub>6</sub> | C <sub>96</sub> H <sub>128</sub> F <sub>12</sub> Fe <sub>4</sub> O <sub>14</sub> P <sub>8</sub> S <sub>2</sub> |
| $\rho_{\text{calc.}}/\text{gcm}^{-3}$ | 1.409                                                                                        | 1.378                                                                                            | 1.403                                                                                                          |
| $\mu/\text{mm}^{-1}$                  | 6.525                                                                                        | 0.700                                                                                            | 6.400                                                                                                          |
| Formula Weight                        | 1144.56                                                                                      | 1171.67                                                                                          | 2269.26                                                                                                        |
| Colour                                | clear red                                                                                    | black                                                                                            | orange                                                                                                         |
| Shape                                 | block-shaped                                                                                 | needle                                                                                           | plate-shaped                                                                                                   |
| Size/mm <sup>3</sup>                  | 0.07 × 0.05 × 0.04                                                                           | 0.05 × 0.01 × 0.00                                                                               | 0.26 × 0.17 × 0.13                                                                                             |
| T/K                                   | 123.00(10)                                                                                   | 100.00(10)                                                                                       | 133.00(10)                                                                                                     |
| Crystal System                        | triclinic                                                                                    | monoclinic                                                                                       | triclinic                                                                                                      |
| Space Group                           | P-1                                                                                          | C2/c                                                                                             | P-1                                                                                                            |
| $a/\text{\AA}$                        | 10.4574(5)                                                                                   | 45.1781(12)                                                                                      | 14.36190(10)                                                                                                   |
| $b/\text{\AA}$                        | 13.7684(4)                                                                                   | 9.86897(17)                                                                                      | 15.92590(10)                                                                                                   |
| $c/\text{\AA}$                        | 20.0423(11)                                                                                  | 27.6331(5)                                                                                       | 26.1504(2)                                                                                                     |
| $\alpha/^\circ$                       | 99.992(3)                                                                                    | 90                                                                                               | 93.8200(10)                                                                                                    |
| $\beta/^\circ$                        | 102.592(4)                                                                                   | 113.564(2)                                                                                       | 104.6430(10)                                                                                                   |
| $\gamma/^\circ$                       | 100.656(3)                                                                                   | 90                                                                                               | 109.6900(10)                                                                                                   |
| $V/\text{\AA}^3$                      | 2698.1(2)                                                                                    | 11293.1(5)                                                                                       | 5372.45(8)                                                                                                     |
| Z                                     | 2                                                                                            | 8                                                                                                | 2                                                                                                              |
| Z'                                    | 1                                                                                            | 1                                                                                                | 1                                                                                                              |
| Wavelength/ $\text{\AA}$              | 1.54184                                                                                      | 0.6888                                                                                           | 1.54184                                                                                                        |
| Radiation type                        | Cu K $\alpha$                                                                                | synchrotron                                                                                      | Cu K $\alpha$                                                                                                  |
| $\theta_{\text{min}}/^\circ$          | 3.351                                                                                        | 1.558                                                                                            | 3.543                                                                                                          |
| $\theta_{\text{max}}/^\circ$          | 65.089                                                                                       | 25.499                                                                                           | 66.734                                                                                                         |
| Measured Refl's.                      | 14949                                                                                        | 43651                                                                                            | 105406                                                                                                         |
| Indep't Refl's                        | 8833                                                                                         | 11357                                                                                            | 18923                                                                                                          |
| Refl's $I \geq 2\sigma(I)$            | 6565                                                                                         | 6508                                                                                             | 18211                                                                                                          |
| R <sub>int</sub>                      | 0.0649                                                                                       | 0.0773                                                                                           | 0.0433                                                                                                         |
| Parameters                            | 691                                                                                          | 703                                                                                              | 1234                                                                                                           |
| Restraints                            | 0                                                                                            | 94                                                                                               | 48                                                                                                             |
| Largest Peak                          | 0.724                                                                                        | 0.521                                                                                            | 0.599                                                                                                          |
| Deepest Hole                          | -0.895                                                                                       | -0.468                                                                                           | -0.552                                                                                                         |
| GooF                                  | 1.006                                                                                        | 0.797                                                                                            | 1.057                                                                                                          |
| wR2 (all data)                        | 0.1469                                                                                       | 0.0691                                                                                           | 0.0936                                                                                                         |
| wR2                                   | 0.1332                                                                                       | 0.0665                                                                                           | 0.0924                                                                                                         |
| R1 (all data)                         | 0.0783                                                                                       | 0.0629                                                                                           | 0.0368                                                                                                         |
| R1                                    | 0.0562                                                                                       | 0.0339                                                                                           | 0.0356                                                                                                         |

## 2.5 Solid state structures

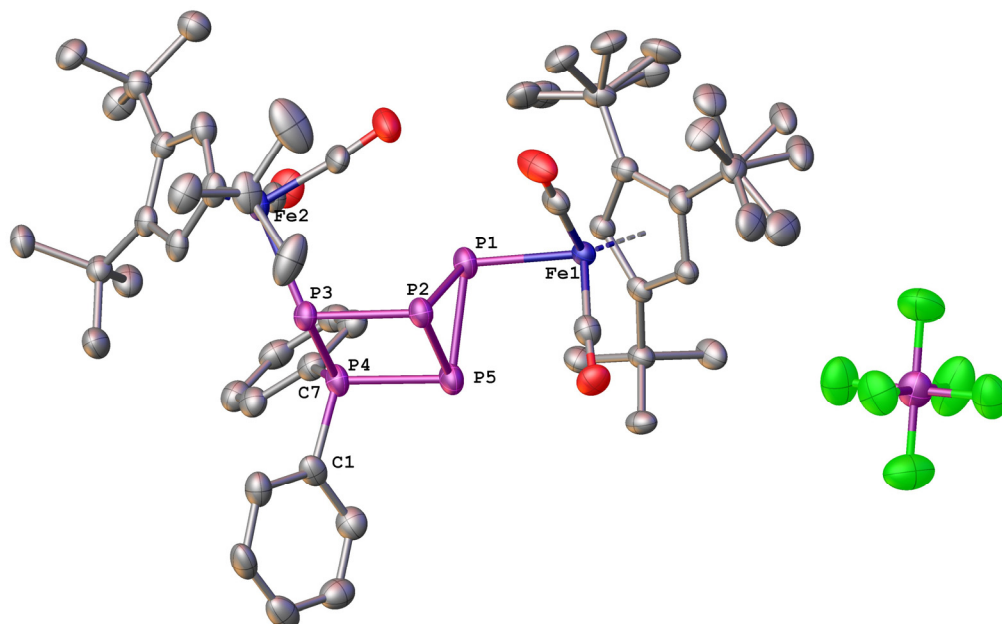

**Figure S20:** Molecular structure of **3a** in the solid state. Hydrogen atoms are omitted for clarity. Selected bond lengths and angles: Fe1-P1 2.3162(12), Fe2-P3 2.3004(15), P1-P5 2.2010(18), P2-P1 2.1971(15), P2-P5 2.2546(17), P3-P2 2.2305(15), P3-P4 2.2128(17), P4-P5 2.1974(16), P4-C1 1.813(5), P4-C7 1.819(4), P2-P3-Fe2 111.52(6), P4-P3-Fe2 124.22(6), P4-P3-P2 84.67(6), P3-P2-P5 94.38(6), P1-P2-P3 103.02(6), P1-P2-P5 59.24(5), P5-P4-P3 96.52(6), C1-P4-P3 107.66(16), C1-P4-P5 103.03(15), C1-P4-C7 104.1(2), C7-P4-P3 127.21(16), C7-P4-P5 115.93(15), P2-P1-Fe1 101.85(5), P2-P1-P5 61.71(5), P5-P1-Fe1 101.19(6), P4-P5-P2 84.43(6), P4-P5-P1 97.58(7), P1-P5-P2 59.05(5).



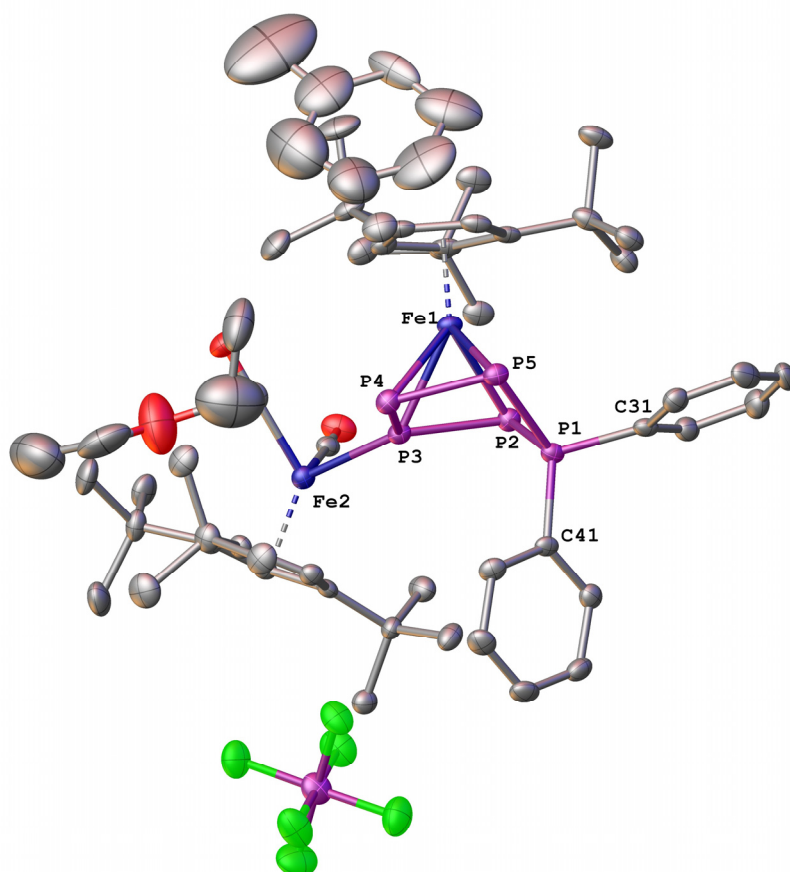

**Figure S21:** Molecular structure of **4** in the solid state. Hydrogen atoms are omitted for clarity. Selected bond lengths and angles: Fe1-P3 2.2925(7), Fe1-P5 2.3422(7), Fe1-P4 2.3517(8), Fe1-P2 2.3610(8), Fe2-P3 2.2567(7), P1-P5 2.1590(9), P1-P2 2.1761(9), P2-P3 2.1293(9), P3-P4 2.1337(9), P4-P5 2.1322(10), P3-Fe1-P2 54.44(2), P3-Fe1-P4 54.68(2), P3-Fe1-P5 90.91(3), P4-Fe1-P2 94.13(3), P5-Fe1-P2 86.41(3), P5-Fe1-P4 54.03(2), P5-P1-P2 95.93(4), C31-P1-P2 107.51(9), C31-P1-P5 106.08(9), C41-P1-P2 118.24(8), C41-P1-P5 119.46(9), C41-P1-C31 108.34(11), P1-P2-Fe1 88.26(3), P3-P2-Fe1 61.14(3), P3-P2-P1 95.50(4), Fe2-P3-Fe1 140.08(3), P2-P3-Fe1 64.42(3), P2-P3-Fe2 132.67(4), P2-P3-P4 108.06(4), P4-P3-Fe1 64.07(3), P4-P3-Fe2 119.16(4), P3-P4-Fe1 61.25(3), P5-P4-Fe1 62.76(3), P5-P4-P3 101.50(4), P1-P5-Fe1 89.16(3), P4-P5-Fe1 63.21(3), P4-P5-P1 99.70(4).

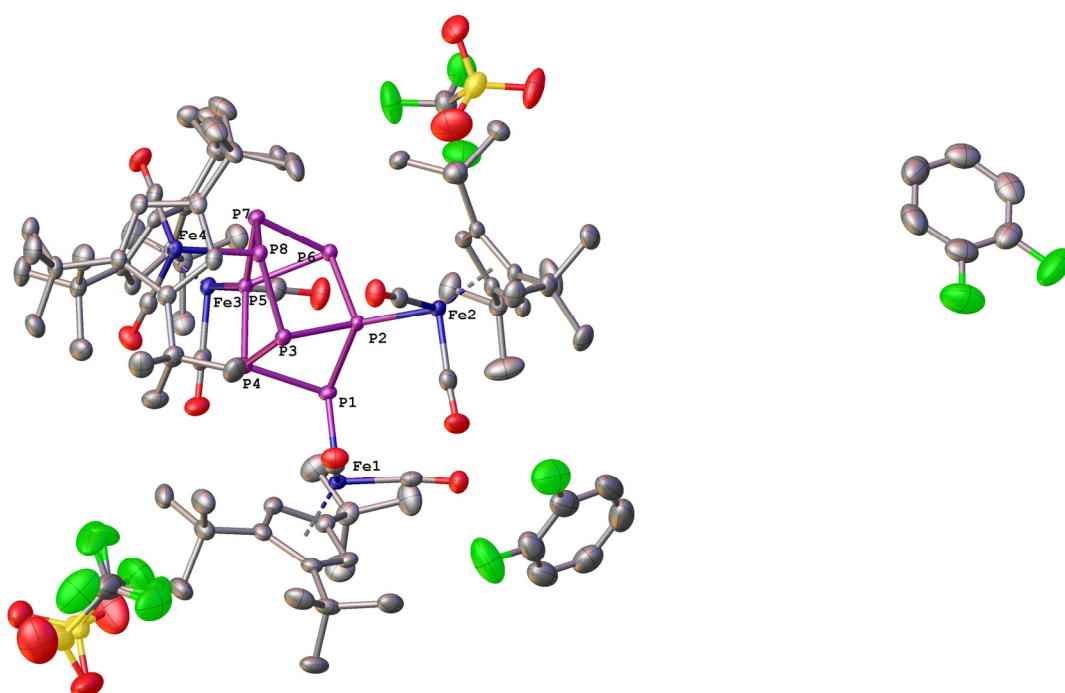

**Figure S22:** Molecular structure of **5** in the solid state. Hydrogen atoms are omitted for clarity. Selected bond lengths and angles: Fe4-P8 2.2756(5), Fe3-P5 2.2468(5), Fe2-P2 2.2587(5), Fe1-P1 2.3040(5), P5-P6 2.2115(7), P5-P7 2.1916(7), P5-P4 2.2134(7), P2-P3 2.1890(7), P2-P6 2.2713(6), P2-P1 2.2758(7), P3-P8 2.1612(7), P3-P4 2.2062(7), P6-P7 2.2071(6), P8-P7 2.1925(7), P4-P1 2.2402(7), P6P5-Fe3 122.66(3), P6-P5-P4 103.66(2), P7-P5-Fe3 130.27(3), P7-P5-P6 60.17(2), P7P5-P4 109.69(3), P4-P5-Fe3 116.00(2), Fe2-P2-P6 114.17(2), Fe2-P2-P1 132.07(2), P3-P2-Fe2 117.79(2), P3-P2-P6 102.17(2), P3-P2-P1 88.64(2), P6-P2-P1 96.02(2), P2-P3-P4 85.04(2), P8-P3-P2 100.83(3), P8-P3-P4 110.76(3), P5-P6-P2 95.91(2), P7-P6-P5 59.47(2), P7-P6-P2 104.70(3), P3-P8-Fe4 111.77(2), P3-P8-P7 100.87(3), P7-P8-Fe4 110.90(2), P5-P7-P6 60.36(2), P5-P7-P8 107.42(3), P8-P7-P6 103.88(2), P5-P4-P1 94.68(2), P3-P4-P5 98.62(3), P3-P4-P1 89.12(2), P2-P1-Fe1 117.51(2), P4-P1-Fe1 105.49(2), P4-P1-P2 82.26(2).

### 3 Details on DFT-calculations

#### 3.1 General remarks

DFT Calculations were performed using the ORCA program package [5]. All calculations were performed in the gas phase and optimized and frequency calculations were performed on geometry optimisations to check for imaginary frequencies indicating local minima. Frequency calculation after geometry optimisation of **3a** showed one very small negative frequency at 5.9 cm<sup>-1</sup> assigned to the rotation of one Cp''' fragment after multiple optimisation attempts and therefore was ignored. The relative energies of **1**, **2a**, **3a**, the decarboxylated form of **3a** and **4** along with all reagents involved were calculated on the BP86 [6–8] /def2-SVP [9,10] level. Input files were generated from solid state structures if possible. Avogadro was used as the graphical user interface [11].

#### 3.2 Thermodynamic data from frequency calculations

Table S10: **1**, **2a**, **3a**, the decarboxylated form of **3a**, **4**, CO and [Ph<sub>2</sub>P]<sup>+</sup> (T = 298,15 K; Energies are given in Hartree, S in Hartree/K, E<sub>SCF</sub> is the total SCF energy):

| Compound                         | E <sub>SCF</sub>           | H                          | S                           | G                           |
|----------------------------------|----------------------------|----------------------------|-----------------------------|-----------------------------|
| <b>1</b>                         | -5.6744393·10 <sup>3</sup> | -5.6745817·10 <sup>3</sup> | 4.81382458·10 <sup>-4</sup> | -5.67472523·10 <sup>3</sup> |
| <b>2a</b>                        | -6.4795590·10 <sup>3</sup> | -6.4784465·10 <sup>3</sup> | 5.59401308·10 <sup>-4</sup> | -6.47861331·10 <sup>3</sup> |
| <b>3a</b>                        | -6.4782691·10 <sup>3</sup> | -6.4784588·10 <sup>3</sup> | 5.52270501·10 <sup>-4</sup> | -6.47862354·10 <sup>3</sup> |
| <b>3a</b> -CO                    | -6.3662735·10 <sup>3</sup> | -6.3651717·10 <sup>3</sup> | 5.40210833·10 <sup>-4</sup> | -6.36533285·10 <sup>3</sup> |
| <b>4</b>                         | -6.2530463·10 <sup>3</sup> | -6.2519551·10 <sup>3</sup> | 5.24493174·10 <sup>-4</sup> | -6.25211153·10 <sup>3</sup> |
| CO                               | -1.1322541·10 <sup>2</sup> | -1.1321765·10 <sup>2</sup> | 7.53027335·10 <sup>-5</sup> | -1.13240104·10 <sup>2</sup> |
| [Ph <sub>2</sub> P] <sup>+</sup> | -8.0396198·10 <sup>2</sup> | -8.0378271·10 <sup>2</sup> | 1.62933992·10 <sup>-4</sup> | -8.03831294·10 <sup>2</sup> |

#### 3.3 Cartesian coordinates of optimised structures

Cartesian coordinates for **1**

|    |                  |                  |                  |
|----|------------------|------------------|------------------|
| Fe | 3.46707827004776 | 5.83255580306058 | 4.76552523561312 |
| Fe | 9.33205094794833 | 9.95471874186724 | 3.65058297647087 |
| P  | 4.82821982199349 | 7.56432261214437 | 3.92636772528074 |
| P  | 6.98304365452824 | 6.89857327931471 | 3.74085139956528 |
| P  | 6.41713451293886 | 8.23198822404679 | 5.41704754611118 |
| P  | 7.13405175462827 | 9.15505490285786 | 3.48034492883929 |
| O  | 5.43686405330763 | 5.09768179620043 | 6.78389482639981 |

|                     |                   |                  |
|---------------------|-------------------|------------------|
| O 4.64739429040817  | 3.97760303240448  | 2.85208539983040 |
| O 8.59463360093019  | 11.55604418182907 | 5.97177403638688 |
| O 10.08312534190273 | 7.68141357154358  | 5.31344590990229 |
| C 1.75972621241572  | 5.38462354505798  | 5.96616679330905 |
| C 1.97731044978123  | 6.85247411672182  | 5.96415873272510 |
| C 1.88518614956429  | 7.26469727251698  | 4.58537973110867 |
| C 1.60830383368218  | 6.16008496819697  | 3.72509267634951 |
| C 1.54427064943468  | 5.01204944557006  | 4.59292582757097 |
| C 10.69172395233700 | 9.47761630485248  | 2.04628381888130 |
| C 11.22630091101673 | 10.59151212541045 | 2.85799281386399 |
| C 10.23651535793696 | 11.63692564629830 | 2.78147293939379 |
| C 9.13266799721689  | 11.26286524476249 | 1.93932197068116 |
| C 9.42389624871807  | 9.92879708190272  | 1.51775369800801 |
| C 1.51290488401715  | 4.31859614702052  | 7.06305480494812 |
| C -0.01781836005398 | 4.29633984467156  | 7.33213441666073 |
| C 2.25466793395623  | 4.52913418481932  | 8.39942300627070 |
| C 1.93056945649511  | 2.91550574119002  | 6.54745778548596 |
| C 4.19107318427659  | 4.74365209598225  | 3.60649899385280 |
| C 4.65619515867948  | 5.43203791067793  | 5.98249480833576 |
| C 8.85375213100492  | 10.90152776297255 | 5.04078938099886 |
| C 9.76364368780446  | 8.57520900126706  | 4.63371340047387 |
| C 2.10894029978755  | 7.90617700334577  | 7.09270464182215 |
| C 0.83860905996682  | 7.86699466487775  | 7.98185301090749 |
| C 3.38309937256180  | 7.73757500719080  | 7.95222875222434 |
| C 2.17986530260463  | 9.33157205079824  | 6.48561066363732 |
| C 1.23306708742998  | 6.22313811896751  | 2.24346441555480 |
| C -0.16583133159493 | 6.89341333045907  | 2.16164313394887 |
| C 2.24806012894747  | 7.06127229284180  | 1.43626946920056 |
| C 1.14406714705048  | 4.80726320541628  | 1.63389737959565 |
| C 11.28069057514398 | 8.14830756794409  | 1.51186831947524 |
| C 12.01248588991017 | 8.48498912358574  | 0.18247167191640 |
| C 12.25805515275884 | 7.41043803951217  | 2.45111854567352 |
| C 10.13768401768110 | 7.14962634692831  | 1.18977344553939 |
| C 12.57602810144450 | 10.83320402901804 | 3.57930593742151 |
| C 13.73278812043468 | 10.73768611152832 | 2.55238649361690 |
| C 12.61962527479949 | 12.26888080614346 | 4.16251504767968 |
| C 12.82014252764407 | 9.87617695761061  | 4.76917527540661 |
| C 8.02119527218459  | 12.19114332818658 | 1.44472154739870 |

|                     |                   |                   |
|---------------------|-------------------|-------------------|
| C 8.69191394063063  | 13.27326747512046 | 0.55643495433757  |
| C 7.29766864088352  | 12.87763490779248 | 2.62522592190753  |
| C 6.99129295296075  | 11.41506145260804 | 0.59733360458798  |
| H 2.02035538278442  | 8.29503725182757  | 4.24107782547994  |
| H 1.34651765585157  | 3.99100651122922  | 4.25297219156670  |
| H 10.32308489975553 | 12.60725724843680 | 3.28057402267174  |
| H 8.77601710304090  | 9.32496483674490  | 0.87518095611553  |
| H -0.58598345645635 | 4.07960010533362  | 6.40461961954534  |
| H -0.37998967444559 | 5.26536196863209  | 7.72713444971145  |
| H -0.26329269477831 | 3.51094526250431  | 8.07757961137690  |
| H 1.99585545161762  | 3.69990388273630  | 9.08977026485194  |
| H 1.96971157740024  | 5.46940029097200  | 8.90569298682104  |
| H 3.35355193812042  | 4.52189061973758  | 8.26433477010797  |
| H 1.31237437033780  | 2.56759933608668  | 5.69659923711691  |
| H 1.80423058726294  | 2.17017159124495  | 7.35887694698044  |
| H 2.99221422113581  | 2.90447138898197  | 6.23069334907500  |
| H 0.74708872701137  | 6.92839957836682  | 8.56034891621296  |
| H -0.08080185378215 | 7.97883961894429  | 7.37024249224677  |
| H 0.86408480864385  | 8.70242301410079  | 8.71222022491248  |
| H 3.39288556027809  | 8.48863890332653  | 8.76963444294316  |
| H 4.28758733210304  | 7.89981903902760  | 7.33266097686595  |
| H 3.46603355957740  | 6.73967056277335  | 8.41247163106923  |
| H 2.28230497582482  | 10.07063007444876 | 7.30616793710545  |
| H 1.26367205347426  | 9.59466457218142  | 5.91749857688390  |
| H 3.05826572655074  | 9.45570947859599  | 5.82003381425070  |
| H -0.51096531720805 | 6.93913219085956  | 1.10763786321080  |
| H -0.13956353722689 | 7.92888813094469  | 2.55666324576181  |
| H -0.91875696071912 | 6.32469196501465  | 2.74498469433026  |
|                     |                   |                   |
| H 3.24448294808247  | 6.57715399644605  | 1.41877454361333  |
| H 2.38409763491514  | 8.07682198156960  | 1.85911057862105  |
| H 1.90053831970810  | 7.17632887927104  | 0.38856308649558  |
| H 0.88643287175268  | 4.87461984791629  | 0.55725184245512  |
| H 0.35830949323681  | 4.19738453898974  | 2.12495879659444  |
| H 2.10808022459696  | 4.26740826082314  | 1.71671965457037  |
| H 12.87113373210825 | 9.16483598914802  | 0.34428718538648  |
| H 11.32618259677543 | 8.97328418885304  | -0.53910790778846 |
| H 12.39573500123542 | 7.55467873718596  | -0.28605926571768 |
| H 13.17170204061032 | 7.99231375974435  | 2.66799021523124  |

|                     |                   |                   |
|---------------------|-------------------|-------------------|
| H 12.58331806384829 | 6.46896852191910  | 1.96398058718662  |
| H 11.78066827605907 | 7.13571047538196  | 3.41134319505434  |
| H 10.57308337635641 | 6.17748735140047  | 0.88370910739141  |
| H 9.49450327789576  | 7.48879726453334  | 0.35384118128655  |
| H 9.48749801762101  | 6.97359477287645  | 2.06999075928021  |
| H 14.69218311839327 | 11.02001712397613 | 3.03328649010750  |
| H 13.56670014737877 | 11.42592214450076 | 1.69826653948901  |
| H 13.85414348090408 | 9.71773632885737  | 2.14629179400305  |
| H 13.58970478134708 | 12.42339841610084 | 4.67676451016195  |
| H 11.82165828865059 | 12.43712487354585 | 4.91348958450124  |
| H 12.53369917498405 | 13.04604285625540 | 3.37598910739340  |
| H 12.75976713438804 | 8.81163173480157  | 4.48977132873082  |
| H 12.07297574462517 | 10.05462224297802 | 5.56732533605726  |
| H 13.82824651749585 | 10.05761865587989 | 5.19889159948996  |
| H 9.23264451227385  | 12.81553695406731 | -0.29752281100224 |
| H 9.41887425209552  | 13.88377966290610 | 1.13098365139148  |
| H 7.92372498837783  | 13.96042055338324 | 0.14395100825146  |
| H 6.55614796001459  | 13.61328984104542 | 2.24897308532580  |
| H 8.00377372578613  | 13.42438449632983 | 3.28370837328723  |
| H 6.75786998311212  | 12.13341218305217 | 3.24504977315318  |
| H 7.45740102757104  | 10.96581766937958 | -0.30389569101747 |
| H 6.19300012386769  | 12.10168469219501 | 0.24789193408914  |
| H 6.51560310762961  | 10.60482717659705 | 1.18722196454130  |

Cartesian coordinates for **2a**

|                     |                   |                  |
|---------------------|-------------------|------------------|
| Fe 3.43103480027236 | 6.27653491873993  | 4.22122356596875 |
| Fe 9.44125697807932 | 10.11913957509240 | 3.62384711103469 |
| P 4.56087226051688  | 8.13131354006404  | 3.40573316732215 |
| P 6.74004640390710  | 7.62402880155145  | 3.07528422440876 |
| P 6.14748099088583  | 8.95463961996078  | 4.77991099813488 |
| P 7.23396797725428  | 9.84353187723092  | 2.99407759436126 |
| O 5.74629999994932  | 5.48041179990348  | 5.81901997811696 |
| O 4.41179947206707  | 4.65992619126567  | 1.99078688582499 |
| O 8.63875675751899  | 11.76411700521482 | 5.89884826063651 |
| O 9.52843561592740  | 7.68450122855279  | 5.23250049086745 |
| C 2.22602548546462  | 5.46476839724110  | 5.82263884668119 |
| C 2.12116906791885  | 6.94266407368171  | 5.81832533322243 |
| C 1.57723242751476  | 7.29841861056179  | 4.52333203960959 |

|                     |                   |                  |
|---------------------|-------------------|------------------|
| C 1.30853806302225  | 6.13728658936456  | 3.73363698056255 |
| C 1.77472213631231  | 5.03033155253414  | 4.52532272843292 |
| C 11.01114543072608 | 9.45501496158686  | 2.29695381915431 |
| C 11.54636808942367 | 10.43213188267729 | 3.27001093968568 |
| C 10.78214103973571 | 11.63845912889292 | 3.06610604667307 |
| C 9.83117007485840  | 11.49447432086660 | 1.99911274659786 |
| C 9.97128630971882  | 10.13969873710549 | 1.56038589644288 |
| C 2.43850323256122  | 4.37517422732114  | 6.90658895447245 |
| C 1.00555296191329  | 4.02716682966231  | 7.41220932094519 |
| C 3.31382334906211  | 4.73759855042628  | 8.12399682982595 |
| C 3.04732350693861  | 3.08969375048084  | 6.28424692078662 |
| C 4.00074244622587  | 5.32967353310077  | 2.84703981843808 |
| C 4.84680430161142  | 5.85029419488300  | 5.18406121840497 |
| C 8.93048980388848  | 11.10408357536747 | 4.98469619465009 |
| C 9.48776027376164  | 8.64329254081378  | 4.57102929916533 |
| C 2.27700799851183  | 7.99978840797371  | 6.93570477048651 |
| C 1.21294622189551  | 7.71479540991639  | 8.03080636198386 |
| C 3.69291408533477  | 8.05055945196674  | 7.55273310403552 |
| C 1.97906465533086  | 9.41382576903332  | 6.38165600704456 |
| C 0.42810722772883  | 6.00558593518067  | 2.49144879604764 |
| C -0.93721564834960 | 5.47180115519720  | 3.01606082647130 |
| C 0.19772972322138  | 7.36374479479193  | 1.80703010645984 |
| C 1.00183060429177  | 5.00311721184299  | 1.46791947640632 |
| C 11.47981643717554 | 8.06920345068049  | 1.79060899801108 |
| C 12.47691921436214 | 8.35091245095660  | 0.62934465716600 |
| C 12.16122648885010 | 7.15239186685429  | 2.82759765856610 |
| C 10.28551648113706 | 7.26883787486498  | 1.21006851878079 |
| C 12.74430217789690 | 10.41794150859940 | 4.25383872810959 |
| C 14.05481629788708 | 10.19497762980991 | 3.45288859233754 |
| C 12.87929267374302 | 11.79764620335348 | 4.94863592108316 |
| C 12.61173645208715 | 9.37328868434279  | 5.38735828950073 |
| C 9.03912564712142  | 12.62735274715373 | 1.34434412644372 |
| C 10.07723975731132 | 13.54869392964141 | 0.64596717213403 |
| C 8.25792546335351  | 13.44713897866547 | 2.39545477283552 |
| C 8.06114245017773  | 12.08476381987266 | 0.28090822528167 |
| H 1.37487087919809  | 8.32583167492497  | 4.20342028511442 |
| H 1.72279364500403  | 3.98204297544477  | 4.21283751123087 |
| H 10.93201432354375 | 12.56285587767455 | 3.63301399841508 |

|                     |                   |                   |
|---------------------|-------------------|-------------------|
| H 9.38977334801091  | 9.68427446352273  | 0.75246466790113  |
| H 0.35645094212247  | 3.67334417545788  | 6.58596007803908  |
| H 0.50904970931466  | 4.89581326807390  | 7.88641284439197  |
| H 1.06597402985737  | 3.21689555562110  | 8.16710844741066  |
| H 3.36074900364963  | 3.85811997090997  | 8.79697930004868  |
| H 2.90240289557686  | 5.57096091503135  | 8.72045826233907  |
| H 4.35380980924249  | 4.98271531429173  | 7.83826156199103  |
| H 2.39852009157699  | 2.62785738698390  | 5.51518576951245  |
| H 3.17640799359774  | 2.33115845241338  | 7.08131891617290  |
| H 4.04409612216832  | 3.27371834125675  | 5.83771991514564  |
| H 1.39167946216915  | 6.76202812061228  | 8.56241173858276  |
| H 0.19149394620960  | 7.68112629086620  | 7.59954358457888  |
| H 1.23241940908356  | 8.52527310154457  | 8.78753808360903  |
| H 3.71514021573731  | 8.79481340674042  | 8.37459065485336  |
| H 4.43845357669952  | 8.36747667825052  | 6.79640690393689  |
| H 4.02460740942974  | 7.08541454007375  | 7.96724551285326  |
| H 2.12452973824047  | 10.15748898914586 | 7.18982420076111  |
| H 0.93440174726062  | 9.51857132979711  | 6.02693167220172  |
| H 2.65998628838832  | 9.69403480428249  | 5.55320138787248  |
| H -1.65495390565630 | 5.38993210339649  | 2.17443748540670  |
| H -1.37581674343576 | 6.15300161021888  | 3.77340710094123  |
| H -0.83782287601389 | 4.46719525349044  | 3.47481171582343  |
| H 1.14918904432056  | 7.80655943269299  | 1.45373527110776  |
| H -0.30484853608628 | 8.08195175079295  | 2.48633122043678  |
| H -0.45829023141258 | 7.23477074010024  | 0.92315307073336  |
| H 0.26239595064603  | 4.82714363718351  | 0.66084020259713  |
| H 1.23155233817468  | 4.01783745257609  | 1.92154335577730  |
| H 1.92384804758680  | 5.39427459616162  | 0.99631433827555  |
| H 13.37035939052943 | 8.90518423172002  | 0.97576452511862  |
| H 12.00076300847407 | 8.94586384154482  | -0.17616324650344 |
|                     |                   |                   |
| H 12.82079751771098 | 7.39291949514392  | 0.18790515539744  |
| H 13.09107925898501 | 7.58261206553142  | 3.24009450285238  |
| H 12.44021642819557 | 6.19961354351041  | 2.33402154382194  |
| H 11.48538875844271 | 6.90161611244284  | 3.66763501734475  |
| H 10.63964765948275 | 6.27250394038968  | 0.87820480699960  |
| H 9.82735823241388  | 7.75312929447331  | 0.32552675924200  |
| H 9.49245454885784  | 7.10853499133043  | 1.96842214914230  |
| H 14.92819482344987 | 10.30259827613476 | 4.12793796942167  |



|                     |                   |                   |
|---------------------|-------------------|-------------------|
| H 14.16217517605191 | 10.94366004862021 | 2.64146975418267  |
| H 14.11348358358132 | 9.18880051976041  | 2.99788685264438  |
| H 13.73481003006717 | 11.76695412266050 | 5.65228568859861  |
| H 11.97951167118477 | 12.05702595079877 | 5.54254650776653  |
| H 13.07819063049477 | 12.61678316636676 | 4.22836167591524  |
| H 12.46444109411515 | 8.34463985013433  | 5.01969291701068  |
| H 11.75947953736619 | 9.62256145617508  | 6.05014566394634  |
| H 13.53163268027935 | 9.37973149965043  | 6.00736315949867  |
| H 10.67563465701716 | 12.98797985566118 | -0.10075303325216 |
| H 10.77921412001335 | 14.00276348178456 | 1.37465087530728  |
| H 9.55863139305021  | 14.37424858242818 | 0.11632460619565  |
| H 7.75825342142272  | 14.31112366173096 | 1.91158008063861  |
| H 8.92062261616328  | 13.84975508605015 | 3.18821638157268  |
| H 7.47680493378325  | 12.82882780728919 | 2.88276319757959  |
| H 8.59302713782558  | 11.54959514770107 | -0.53223310883845 |
| H 7.50792551450303  | 12.92473997152439 | -0.18595041362974 |
| H 7.31446668931123  | 11.39385925454224 | 0.72423746364264  |
| P 4.14170673665717  | 9.83731953860904  | 1.96267039218050  |
| C 2.89335615325153  | 10.87275303510507 | 2.84386413890554  |
| C 3.44115711869234  | 11.88163707429697 | 3.67489266953831  |
| C 2.60398645011460  | 12.77548746111229 | 4.36104526440232  |
| H 3.04495457773025  | 13.55479276713573 | 5.00128600024333  |
| C 1.20885011804230  | 12.68653333853819 | 4.21506067838764  |
| H 0.55190040536160  | 13.39586785358161 | 4.74128277739651  |
| C 0.65484989263055  | 11.69448343026586 | 3.38579241833535  |
| H -0.43727760415453 | 11.62643485022103 | 3.26263672394948  |
| H 4.53531152179849  | 11.96831778942984 | 3.77390109979093  |
| C 1.48793008056452  | 10.78934366707325 | 2.70802151886432  |
| H 1.04232478459846  | 10.02280844628166 | 2.05907730205358  |
| C 3.30758784327981  | 9.06271597068704  | 0.51849242661061  |
| C 2.44275504121830  | 9.83492645570127  | -0.29749984810060 |
|                     |                   |                   |
| H 2.14417665064110  | 10.84826337823548 | 0.01094656905430  |
| C 1.97258760346017  | 9.32441355199917  | -1.51832061189396 |
| H 1.29884199820329  | 9.93743927033893  | -2.13669274285747 |
| C 2.36347755983834  | 8.04705941702553  | -1.95490106992737 |
| C 3.24203367999152  | 7.28423445956157  | -1.16583093961863 |
| H 3.56832550317920  | 6.28884447976334  | -1.50465634412033 |
| H 1.99426163265661  | 7.65195683021970  | -2.91340929070970 |

|                    |                  |                  |
|--------------------|------------------|------------------|
| C 3.71515564024440 | 7.78762389302061 | 0.05607578111698 |
| H 4.41845075891517 | 7.18269828231720 | 0.64861725710564 |

Cartesian coordinates for **3a**

|                      |                   |                   |
|----------------------|-------------------|-------------------|
| Fe -4.28432384517194 | -1.08635026421967 | 14.49345434516177 |
| Fe 0.38110441495623  | 3.37136145016491  | 15.27134811087277 |
| P -1.13355655726442  | 3.45452891538698  | 13.52660563874998 |
| P -3.05768887263011  | 2.27039888607939  | 13.88994855536273 |
| P -0.95829653179676  | 2.20066717604805  | 11.64461124835378 |
| P -2.36918391933369  | 0.13730449711481  | 13.94839020816314 |
| P -2.87975820179563  | 1.05999448059073  | 11.94867595167144 |
| O -6.27399752683393  | 0.40835093726180  | 12.95957249644302 |
| O -0.99781271285914  | 1.27760176440884  | 16.75844564450651 |
| O 2.06173263515945   | 1.33976589395275  | 14.01767481733544 |
| O -4.67283459117002  | 0.69395263594883  | 16.77667570397388 |
| C -4.18177097474932  | -2.87553634228374 | 13.27790713855908 |
| C -3.08996392117691  | -2.82874866382621 | 14.19910866801904 |
| H -2.03774584843683  | -2.82615590930430 | 13.90324339716268 |
| C -4.13021573957701  | -3.18603330464482 | 11.78305475353670 |
| C 2.02255793369649   | 4.33819596293472  | 16.24558968966759 |
| C -3.54433914977195  | -2.80769787722160 | 15.56712937306604 |
| C -1.30859706366093  | 3.31572893505732  | 10.22322462691571 |
| C 0.86043185777133   | 4.27237742791809  | 17.09663473127102 |
| H 0.82934695598464   | 3.75221809673559  | 18.05859490374191 |
| C 0.46394538686825   | 1.17225448483395  | 11.11067755995518 |
| C 0.24431378251242   | 5.51057592081118  | 15.29151364003471 |
| H -0.35633303753508  | 6.09871149580465  | 14.59203289929357 |
| C 3.36848728659290   | 3.81126300974156  | 16.80450884575129 |
| C 1.62086960839630   | 5.14916928377919  | 15.06983973148482 |
| C -5.15922971685563  | -2.35606065429385 | 10.98686215686806 |
| H -6.18825070198836  | -2.46560589717837 | 11.38360017285219 |
| H -5.18194235243724  | -2.69234512203073 | 9.93040705602872  |
| H -4.90271646004744  | -1.27840562343823 | 10.99192508643703 |
| C -5.36051322449343  | -2.83853738626779 | 14.10226446099879 |
| H -6.38504099434870  | -2.86158010425530 | 13.71633388778511 |
| C -0.24506210829508  | 5.00615136728649  | 16.53452624094781 |
| C -5.02699965391393  | -2.80956898348829 | 15.50457337417935 |
| C 2.40577046111582   | 5.73944358679540  | 13.87349273054795 |

|                     |                   |                   |
|---------------------|-------------------|-------------------|
| C -2.53261106943822 | -2.96778415785412 | 16.73163965445164 |
| C -5.44104056881643 | -0.16133314783903 | 13.53923532268880 |
| C 1.43218854026837  | 1.70350507668751  | 10.22603794548602 |
| H 1.31712294167105  | 2.71865919578743  | 9.81913894789621  |
| C -2.72098151694810 | -2.94001837297040 | 11.20998645936072 |
| H -2.40907671200388 | -1.88489823508430 | 11.34402268114765 |
| H -2.70864805196560 | -3.15775758063176 | 10.12312238862765 |
| H -1.95845249141404 | -3.59275268583833 | 11.68126957728109 |
| C 4.45908638776180  | 3.46368643182441  | 15.77100369179582 |
| H 4.13617656841163  | 2.66829719626300  | 15.07297578806444 |
| H 5.35022874586805  | 3.08141732040828  | 16.30803445129287 |
| H 4.79611542363540  | 4.33490847855530  | 15.18237214914751 |
| C 1.72045930760550  | -0.91221990999457 | 11.22593546402446 |
| H 1.83751405856225  | -1.93203605510205 | 11.62136837827411 |
| C 1.39456036388918  | 2.17934139679477  | 14.47081251485488 |
| C 0.62173293647050  | -0.13481290916619 | 11.62225327666467 |
| H -0.11054685878318 | -0.53097434401524 | 12.34307592255851 |
| C -4.49187864473015 | -0.02070226765552 | 15.87569509316664 |
| C 3.55778496927620  | 6.62685775413403  | 14.41339767428180 |
| H 3.17647426321698  | 7.39907518906846  | 15.11175669587889 |
| H 4.05108945699246  | 7.15260857687259  | 13.57090832438602 |
| H 4.33815246176344  | 6.04874659996578  | 14.94060101904093 |
| C 3.13853868889570  | 2.52990453128964  | 17.64734814542216 |
| H 2.50973409484967  | 2.70095390122969  | 18.54225212280535 |
| H 4.11363931894377  | 2.15767489734551  | 18.01888757843645 |
| H 2.67708133066863  | 1.72006610958274  | 17.04835078615872 |
| C 2.94853336627422  | 4.66667520968902  | 12.90201138644809 |
| H 3.59231111843788  | 3.91797947985272  | 13.39044667197397 |
| H 3.54574786105125  | 5.15104102239227  | 12.10256475748594 |
| H 2.11371037834853  | 4.12432376412923  | 12.41492116184816 |
| C 2.67555975430061  | -0.38762016079618 | 10.33818562684948 |
| H 3.53796181413491  | -0.99884256114320 | 10.03312200652596 |
|                     |                   |                   |
| C -6.16535664252833 | -3.00655976235871 | 16.53583839067441 |
| C -1.57742979756871 | 4.68863882360059  | 10.39238750917242 |
| H -1.56644069692265 | 5.12231261920019  | 11.40420795148386 |
| C -1.37543048263854 | 2.74127828311424  | 8.93106285543512  |
| H -1.18523825534704 | 1.66642444884602  | 8.78707251417854  |
| C -4.47485580150624 | -4.69447055192677 | 11.64477780543668 |

|                     |                   |                   |
|---------------------|-------------------|-------------------|
| H -3.77184113085546 | -5.32663508155447 | 12.22389116080596 |
| H -4.41328277577888 | -5.00385573792441 | 10.58134722198741 |
| H -5.50150922476166 | -4.91428351890760 | 12.00060883634232 |
| C 3.90498552407290  | 4.92001439879648  | 17.75377314146854 |
| H 4.11323020912858  | 5.86487381853761  | 17.21631537042123 |
| H 4.85004634711436  | 4.58548054034794  | 18.22791285029179 |
| H 3.18207709684721  | 5.14557134445537  | 18.56329829377528 |
| C 2.53199434142094  | 0.91997758702134  | 9.84392397600968  |
| H 3.27836524483485  | 1.33379160463648  | 9.14966273698435  |
| C -1.68804739678141 | 3.54370840219907  | 7.82437774627766  |
| H -1.73817327076851 | 3.09226964582122  | 6.82240284137163  |
| C -1.93610423080970 | 4.91796786373506  | 7.99412957376906  |
| H -2.18339276707158 | 5.54332018591288  | 7.12340125685244  |
| C -1.88252041988417 | 5.48696695985515  | 9.27661231612985  |
| H -2.09003807923038 | 6.55833096023456  | 9.41530218213261  |
| C -1.56077062410225 | 5.38026237299359  | 17.21504079605489 |
| C -1.39769315739872 | 6.84882409956995  | 17.69651660054159 |
| H -0.54275390819908 | 6.95498355977341  | 18.39442523278737 |
| H -2.31257741160858 | 7.17844164767431  | 18.22944862822595 |
| H -1.23208913196109 | 7.54223315970254  | 16.84756395362416 |
| C -0.48993335573157 | 2.11140536134737  | 16.12463336320094 |
| C 1.48759735295817  | 6.66503201159138  | 13.03826494857312 |
| H 0.61587669250874  | 6.12078930441512  | 12.62204315468960 |
| H 2.06083949861827  | 7.06810155902522  | 12.18022125093042 |
| H 1.11740351927402  | 7.53344133640575  | 13.61881266211213 |
| C -2.74673538138279 | 5.29551751754009  | 16.23142549209401 |
| H -2.59396371716008 | 5.91943999498399  | 15.32791448007250 |
| H -3.67552981834100 | 5.65155938293559  | 16.72085471526922 |
| H -2.92591542938196 | 4.25221377283484  | 15.89929754071711 |
| C -1.84154153073634 | 4.48171826454922  | 18.43680949975048 |
| H -1.93380873571883 | 3.41392051213543  | 18.15853379225103 |
| H -2.79687347151602 | 4.78130655188271  | 18.91213653991218 |
| H -1.05405472003849 | 4.57294430297805  | 19.21207779289810 |
| C -6.46969366827795 | -4.53073652233897 | 16.56558196047142 |
| H -6.74363512293890 | -4.90977603163459 | 15.56064149057548 |
| H -7.32168762513735 | -4.73298045559899 | 17.24638958728093 |
| H -5.60379531132705 | -5.12034680466513 | 16.92367044041973 |
| C -1.08453755592253 | -3.00811992898669 | 16.18091837437208 |

|                     |                   |                   |
|---------------------|-------------------|-------------------|
| H -0.90687842817235 | -3.87375990754388 | 15.51174229997505 |
| H -0.37749224466553 | -3.10506022614956 | 17.02867103891087 |
| H -0.81918182602333 | -2.07753597270808 | 15.63899903454442 |
| C -2.79125666715952 | -4.33688330052161 | 17.41500179998911 |
| H -3.76842979125112 | -4.38166930640628 | 17.92989188453145 |
| H -2.00849550692229 | -4.52977758928258 | 18.17669303364558 |
| H -2.75643537991244 | -5.16632547198252 | 16.67994648110616 |
| C -2.56990692180060 | -1.82304864165864 | 17.76789297508499 |
| H -2.23809932337913 | -0.86878908317225 | 17.31454467576807 |
| H -1.87291178836409 | -2.05396864513687 | 18.59939354535644 |
| H -3.56613573064386 | -1.66000827521313 | 18.20821981681405 |
| C -5.88099721007206 | -2.52561881716565 | 17.97297537231664 |
| H -5.04856055227088 | -3.06735921135310 | 18.45640997782057 |
| H -6.78041361409629 | -2.70719017412157 | 18.59463816438281 |
| H -5.66993880131754 | -1.44028277637191 | 18.01648749875545 |
| C -7.44684556664476 | -2.26618524498277 | 16.07135481438912 |
| H -7.27616547534453 | -1.17581244994261 | 15.97339855449829 |
| H -8.24711550060002 | -2.41416046920333 | 16.82299514171477 |
| H -7.84795970291251 | -2.64092205982401 | 15.10993355254547 |

Cartesian coordinates for **3a**-CO

|                      |                   |                   |
|----------------------|-------------------|-------------------|
| Fe -3.79274893401707 | -0.43117540822468 | 14.69834596898268 |
| Fe -0.16455514756921 | 2.47425853107216  | 14.89366228948742 |
| P -0.96542257714830  | 3.78192660908364  | 13.20257730288496 |
| P -3.12257926449535  | 2.82785801719101  | 13.14670551826543 |
| P -0.87931978048603  | 2.61232248399241  | 11.29839357117721 |
| P -2.05239036926348  | 1.20438391724470  | 14.23955610715702 |
| P -2.28191883678942  | 1.00628962439929  | 11.98740613479659 |
| O -5.63284041201494  | 0.35637800382934  | 12.57169963888122 |
| O 1.67086463668876   | 0.81877080682433  | 13.37577892303305 |
| O -5.23933415717160  | 1.58853112335828  | 16.21170732553819 |
| C -3.57056809101099  | -2.53671063888149 | 14.00843027225371 |
| C -2.45273861146942  | -2.22137205537041 | 14.89507378642024 |
| C 0.21909088640953   | 2.25315971203630  | 16.96135153919878 |
| C -3.03283929015984  | -1.77623547876756 | 16.14900908840967 |
| C -1.76683375683805  | 3.55450919432219  | 9.99696573086388  |
| C -0.80745417193434  | 3.25271832458963  | 16.85504662748795 |

|                     |                   |                   |
|---------------------|-------------------|-------------------|
| C 0.65908138889822  | 2.03252467024500  | 10.50279712900297 |
| C 1.11617609949291  | 4.00417201083299  | 15.68992557714011 |
| C 1.42942049605003  | 2.69998121263024  | 16.30967212395317 |
| C -4.77848274192223 | -2.27910778701995 | 14.77997454144299 |
| C -0.26193997808202 | 4.28401711240403  | 16.04369428311523 |
| C -4.46513672706116 | -1.89493390331271 | 16.11798191555630 |
| C -4.80352807698086 | 0.06612082185305  | 13.33503221559349 |
| C 1.54691924527975  | 2.98180361112802  | 9.94592836435172  |
| H 1.32244640877816  | 4.05842583241473  | 10.00692929045469 |
| C 2.10441758997176  | 0.22720775798698  | 9.74401753516963  |
| H 2.32061810237286  | -0.84879563016811 | 9.66065115688307  |
| C 0.90265331050501  | 1.48001784357785  | 13.96657425025658 |
| C 0.94168557164806  | 0.65505766702732  | 10.40454024815515 |
| H 0.25524970959564  | -0.08505623201186 | 10.84542095888627 |
| C -4.59709176835826 | 0.79708787950273  | 15.64767147721786 |
| C 2.99142326707553  | 1.17000844069731  | 9.19769507500065  |
| H 3.90550833497280  | 0.83114184159938  | 8.68673341774186  |
| C -2.30168688841297 | 4.83505033936373  | 10.25331558532064 |
| H -2.16273626263765 | 5.30451064143123  | 11.24087673497659 |
| C -1.92680115034937 | 2.96383578995411  | 8.72209421372581  |
| H -1.50514101711237 | 1.96899372088574  | 8.51061621024881  |
| C 2.71406311040656  | 2.54545712828857  | 9.30145838103545  |
| H 3.40752578727893  | 3.28347334278537  | 8.87084727753810  |
| C -2.62267583091782 | 3.65248849450882  | 7.71764293108936  |
| H -2.74827737594602 | 3.18961156497411  | 6.72700452959975  |
| C -3.15502785693372 | 4.92879416478582  | 7.97376578917213  |
| H -3.69627237978532 | 5.46712161263052  | 7.18086334570149  |
| C -2.99120198158756 | 5.51873221939898  | 9.23805619164085  |
| H -3.39817194377432 | 6.52105462428302  | 9.43841673191512  |
| H 0.13324337664713  | 1.32670010778166  | 17.53659265064532 |
| H -0.79598263617078 | 5.19907143242913  | 15.76857356155015 |
| H -2.45881878074236 | -1.47833268920434 | 17.02983767575366 |
| H -5.79396133586183 | -2.44935613423727 | 14.40754664817624 |
| C -5.42902995478625 | -1.91167120197980 | 17.30414862822415 |
| C -5.49310377209706 | -3.40658656948586 | 17.73768846048051 |
| H -5.87644646107529 | -4.05138024410736 | 16.92118435061351 |
| H -6.17353854688440 | -3.51444879618793 | 18.60701308844901 |
| H -4.49519130124577 | -3.78714755654752 | 18.03516117215141 |

|                     |                   |                   |
|---------------------|-------------------|-------------------|
| C -6.84888921565381 | -1.45002800429743 | 16.90698249823079 |
| H -7.27244223423443 | -2.06412335265014 | 16.08682673580662 |
| H -7.53105070803927 | -1.55544452796952 | 17.77433691284298 |
| H -6.86774366867830 | -0.38860105608842 | 16.59369409206458 |
| C -4.91519091242102 | -1.07749002090686 | 18.49502564692337 |
| H -5.61729456864227 | -1.17257246285150 | 19.34803941509978 |
| H -3.92576612335808 | -1.43006230684773 | 18.85062594990987 |
| H -4.83562346848133 | -0.00171700977011 | 18.24951158902283 |
| C -3.73290612639183 | -3.32213094593134 | 12.68014456392559 |
| C -4.01990515632537 | -4.79190837443552 | 13.11148163286516 |
| H -3.18802495210261 | -5.21982894291296 | 13.70391029928859 |
| H -4.15950858023284 | -5.42478148301176 | 12.21146413024788 |
| H -4.94225626697614 | -4.86325929241185 | 13.72260878871443 |
| C -2.53668233178256 | -3.31263115905206 | 11.71212140775382 |
| H -1.65059533607957 | -3.83076281515055 | 12.12016244062459 |
| H -2.82183626476124 | -3.85080103205428 | 10.78589509196604 |
| H -2.25478951977403 | -2.28144362724667 | 11.42214042967373 |
| C -4.94766195438659 | -2.82107296440243 | 11.85745728242455 |
| H -5.10806103558575 | -3.51039481318067 | 11.00497196184321 |
| H -5.89699476565693 | -2.79646327555904 | 12.42630817092031 |
| H -4.76708743298938 | -1.81351064291502 | 11.43836079372020 |
| C -0.93366038807072 | -2.50594849111312 | 14.81261661860111 |
| C -0.21900501822698 | -1.93248754071057 | 16.06035836311983 |
| H -0.34630003359766 | -0.83262242963649 | 16.12796722570407 |
| H 0.86614369796847  | -2.14043836421768 | 15.98324824361138 |
| H -0.56930286284660 | -2.39432418798939 | 17.00453492631174 |
| C -0.21866562440198 | -1.90132189710108 | 13.58682567240050 |
| H -0.37294621112859 | -0.80769611716316 | 13.54614569069479 |
| H 0.87224851474041  | -2.08200554043651 | 13.66631580911454 |
| H -0.55753376842338 | -2.32870766442255 | 12.63192597905620 |
| C -0.73998874205827 | -4.04589104758989 | 14.83977776823799 |
| H 0.34236577900258  | -4.28172335193825 | 14.90246350174265 |
| H -1.23611764685925 | -4.50291197102140 | 15.72029226527273 |
| H -1.13336667879232 | -4.53660018899378 | 13.93025401390074 |
| C 1.98972829275856  | 5.08245427592940  | 14.99554081513650 |
| C 3.11083624819714  | 5.55387174517046  | 15.96045693112976 |
| H 2.68819172700955  | 5.88895506839561  | 16.92966698931976 |
| H 3.64304516080822  | 6.41839969672773  | 15.51309255486704 |

|                     |                   |                   |
|---------------------|-------------------|-------------------|
| H 3.86631805912720  | 4.77541730336186  | 16.16936553689704 |
| C 1.14387610598092  | 6.34466438060886  | 14.68318032577837 |
| H 0.75022318984578  | 6.82276283627818  | 15.60288176848022 |
| H 1.78499998390645  | 7.09309207163459  | 14.17542575453169 |
| H 0.29408264411178  | 6.12249378352266  | 14.00751714525605 |
| C 2.59038866800226  | 4.60186314976150  | 13.65304516397056 |
| H 3.25702804720448  | 5.38390081222246  | 13.23365283484870 |
| H 3.17433031203279  | 3.67133696178964  | 13.74987027630929 |
| H 1.78411141756165  | 4.41182662989516  | 12.91541482320754 |
| C 2.75593455237989  | 1.95841352760666  | 16.62113197267238 |
| C 2.51538606469149  | 0.44130081728962  | 16.82034512946971 |
| H 1.82114716722978  | 0.21848897648801  | 17.65428271262075 |
| H 3.47790335761163  | -0.04822158551255 | 17.07069922468538 |
| H 2.12763489698683  | -0.03580976404868 | 15.90105509218789 |
| C 3.23965795903209  | 2.53377626532860  | 17.98585693798961 |
| H 2.48032533965027  | 2.37354192182585  | 18.77793446857617 |
| H 4.17267838283447  | 2.02157020735630  | 18.29800068719972 |
| H 3.44707635005361  | 3.61886084698327  | 17.93177514670373 |
| C 3.89492176470733  | 2.08637012171174  | 15.58758726714621 |
| H 4.77400024151341  | 1.52257810260204  | 15.95963067893735 |
| H 3.61862036623567  | 1.65433821429396  | 14.60747762425740 |
| H 4.22670769354692  | 3.12668726365280  | 15.43286338025723 |
| C -2.08526857005474 | 3.35373288368588  | 17.67751075570891 |
| C -1.73448261055044 | 4.21875910017361  | 18.92300194868951 |
| H -0.91205106121377 | 3.76198008723811  | 19.51032197043137 |
| H -2.62145332248529 | 4.30876502473551  | 19.58412688990003 |
| H -1.42111243795459 | 5.24164926004560  | 18.63197781358327 |
| C -2.53482984763037 | 1.96347960145948  | 18.16828827438465 |
| H -1.79103933044759 | 1.51990244014614  | 18.86162552166951 |
| H -3.49261057090050 | 2.04301125659659  | 18.71944769956563 |
| H -2.67841594117193 | 1.25733817432605  | 17.32627515054448 |
| C -3.20739334667797 | 4.05865988849017  | 16.88758921489974 |
| H -4.13245733245737 | 4.11682272655561  | 17.49512155905033 |
| H -2.92438257816234 | 5.09588479834239  | 16.61881674162069 |
| H -3.45493659104368 | 3.52156012147193  | 15.95036576310923 |

Cartesian coordinates for [Ph<sub>2</sub>P]<sup>+</sup>

|                     |                  |                  |
|---------------------|------------------|------------------|
| H -2.81029505290288 | 6.18397711900421 | 9.73143037677821 |
|---------------------|------------------|------------------|



|                     |                   |                   |
|---------------------|-------------------|-------------------|
| C -2.24702713037520 | 5.27392744734249  | 9.47754953187262  |
| C -1.90202971837021 | 4.36151777232332  | 10.47640779071743 |
| H -2.20281528533194 | 4.54836769972163  | 11.52029975337520 |
| C -1.13713761431867 | 3.18937994572326  | 10.15672250278754 |
| C -0.80527590809520 | 2.92891836861653  | 8.78789233436006  |
| P -0.81735175870561 | 2.14943739386979  | 11.56292238883900 |
| H 1.62219666368201  | 2.25248355329552  | 9.65428430310182  |
| C 1.60851311628775  | 1.32501557616092  | 10.24426236489007 |
| C 0.56035497790163  | 1.08868204700339  | 11.19123147693557 |
| C 2.65309650238373  | 0.40938938836373  | 10.11992226993722 |
| C 0.63139102278270  | -0.07217765212211 | 12.03285928986797 |
| C 2.67353777695092  | -0.75773397638718 | 10.91838497280118 |
| H -0.14587056829463 | -0.24034308566063 | 12.79655356104819 |
| C 1.66428772162779  | -0.99835467523601 | 11.87317508848743 |
| H 1.69999374350247  | -1.90093365438379 | 12.50112644638162 |
| H -2.18521851750466 | 5.71609500237519  | 7.34797467426603  |
| C -1.88969314153858 | 5.00991548890581  | 8.13945318165062  |
| C -1.18553003501509 | 3.83235768468136  | 7.79603181936613  |
| H -0.95144011831427 | 3.62165862347850  | 6.74170058125130  |
| H -0.30081549306715 | 1.99334005582346  | 8.50744766779533  |
| H 3.47242565119205  | 0.60217735761383  | 9.41088051151404  |
| H 3.50320316552303  | -1.47409748051324 | 10.81018711197529 |

## Appendix

### List of Figures

|                                                                                                                                           |    |
|-------------------------------------------------------------------------------------------------------------------------------------------|----|
| <b>S1</b> $^{31}\text{P}\{^1\text{H}\}$ VT NMR spectrum from the reaction of <b>1</b> with $[\text{Ph}_2\text{P}][\text{OTf}]$ . . . . .  | 4  |
| <b>S2</b> $^{31}\text{P}\{^1\text{H}\}$ NMR spectrum from the reaction of <b>1</b> with $[\text{Ph}_2\text{P}][\text{OTf}]$ . . . . .     | 5  |
| <b>S3</b> $^{31}\text{P}\{^1\text{H}\}$ NMR spectrum from the reaction of <b>1</b> with $[\text{Ph}_2\text{P}][\text{OTf}]$ . . . . .     | 6  |
| <b>S4</b> $^{31}\text{P}$ - $^{31}\text{P}$ COSY NMR spectrum of <b>2a</b> and <b>3a</b> at 193 K . . . . .                               | 7  |
| <b>S5</b> Simulation of the spin systems in the $^{31}\text{P}\{^1\text{H}\}$ NMR spectrum of compounds <b>2a</b> and <b>3a</b> . . . . . | 8  |
| <b>S6</b> $^{31}\text{P}\{^1\text{H}\}$ VT NMR spectrum of the reaction of <b>1</b> with $[\text{Me}_2\text{P}][\text{OTf}]$ . . . . .    | 9  |
| <b>S7</b> $^{31}\text{P}\{^1\text{H}\}$ NMR spectrum from the reaction of <b>1</b> with $[\text{Me}_2\text{P}][\text{OTf}]$ . . . . .     | 10 |
| <b>S8</b> $^{31}\text{P}$ - $^{31}\text{P}$ COSY NMR spectrum of <b>2b</b> and <b>3b</b> at 193 K . . . . .                               | 11 |

|            |                                                                                                                                                                                      |    |
|------------|--------------------------------------------------------------------------------------------------------------------------------------------------------------------------------------|----|
| <b>S9</b>  | Simulation of the spin systems in the $^{31}\text{P}\{^1\text{H}\}$ NMR spectrum of compounds <b>2b</b> and <b>3b</b> . . . . .                                                      | 12 |
| <b>S10</b> | Simulation (inverted) of the $^{31}\{^1\text{H}\}$ NMR spectrum of <b>4</b> . . . . .                                                                                                | 13 |
| <b>S11</b> | $^{31}\text{P}\{^1\text{H}\}$ NMR spectrum from the reaction of <b>1</b> with $[\text{Ph}_2\text{P}][\text{PF}_6]$ . . . . .                                                         | 14 |
| <b>S12</b> | $^{31}\text{P}$ $^{31}\text{P}$ COSY NMR spectrum of <b>4</b> at room temperature. . . . .                                                                                           | 15 |
| <b>S13</b> | Simulation of the $^{31}\text{P}\{^1\text{H}\}$ NMR spectrum of coordination mode 1 and 2 of $[\text{Ph}_2\text{As}][\text{OTf}]$ on <b>1</b> . . . . .                              | 16 |
| <b>S14</b> | Comparison of the $^{31}\text{P}\{^1\text{H}\}$ NMR spectrum of coordination mode 1 and 2 of $[\text{Ph}_2\text{As}][\text{OTf}]$ on <b>1</b> at 193 K and room temperature. . . . . | 17 |
| <b>S15</b> | $^{31}\text{P}\{^1\text{H}\}$ NMR spectrum from the reaction of <b>1</b> with $[\text{Ph}_2\text{As}][\text{OTf}]$ . . . . .                                                         | 18 |
| <b>S16</b> | $^{31}\text{P}$ $^{31}\text{P}$ COSY NMR spectrum of <b>5</b> at 273 K. . . . .                                                                                                      | 19 |
| <b>S17</b> | $^{31}\text{P}$ VT NMR spectrum of <b>5</b> . . . . .                                                                                                                                | 20 |
| <b>S18</b> | $^{31}\text{P}$ NMR spectrum of <b>5</b> . . . . .                                                                                                                                   | 21 |
| <b>S19</b> | $^1\text{H}$ NMR spectrum of <b>5</b> in $\text{CD}_2\text{Cl}_2$ at room temperature. . . . .                                                                                       | 22 |
| <b>S20</b> | Molecular structure of <b>3a</b> in the solid state. . . . .                                                                                                                         | 24 |
| <b>S21</b> | Molecular structure of <b>4</b> in the solid state. . . . .                                                                                                                          | 25 |
| <b>S22</b> | Molecular structure of <b>5</b> in the solid state. . . . .                                                                                                                          | 26 |

## List of Tables

|            |                                                                                                                                                                                          |    |
|------------|------------------------------------------------------------------------------------------------------------------------------------------------------------------------------------------|----|
| <b>S1</b>  | $^{31}\text{P}\{^1\text{H}\}$ NMR data of <b>2a</b> : ( $\text{CD}_2\text{Cl}_2$ ; 193 K): . . . . .                                                                                     | 2  |
| <b>S2</b>  | $^{31}\text{P}\{^1\text{H}\}$ NMR data of <b>3a</b> : ( $\text{CD}_2\text{Cl}_2$ ; 193 K): . . . . .                                                                                     | 2  |
| <b>S3</b>  | $^{31}\text{P}\{^1\text{H}\}$ NMR data of <b>2b</b> : ( $\text{CD}_2\text{Cl}_2$ ; 193 K): . . . . .                                                                                     | 2  |
| <b>S4</b>  | $^{31}\text{P}\{^1\text{H}\}$ NMR data of <b>3b</b> : ( $\text{CD}_2\text{Cl}_2$ ; 193 K): . . . . .                                                                                     | 3  |
| <b>S5</b>  | $^{31}\text{P}\{^1\text{H}\}$ NMR data of <b>4</b> : ( $\text{CD}_2\text{Cl}_2$ ; 300 K): . . . . .                                                                                      | 3  |
| <b>S6</b>  | $^{31}\text{P}\{^1\text{H}\}$ NMR data of coordination mode 1 of $[\text{Ph}_2\text{As}][\text{OTf}]$ on <b>1</b><br>from the simulation (in $\text{CD}_2\text{Cl}_2$ at 193 K). . . . . | 3  |
| <b>S7</b>  | $^{31}\text{P}\{^1\text{H}\}$ NMR data of coordination mode 2 of $[\text{Ph}_2\text{As}][\text{OTf}]$ on <b>1</b><br>from the simulation (in $\text{CD}_2\text{Cl}_2$ at 193 K). . . . . | 3  |
| <b>S8</b>  | $^{31}\text{P}$ NMR data of <b>5</b> : ( $\text{CD}_2\text{Cl}_2$ ; 273 K):. . . . .                                                                                                     | 18 |
| <b>S9</b>  | Crystallographic data for <b>3a</b> , <b>4</b> and <b>5</b> : . . . . .                                                                                                                  | 23 |
| <b>S10</b> | Thermodynamic data of <b>1</b> , <b>2a</b> , <b>3a</b> , the decarboxylated form of <b>3a</b> ,<br><b>4</b> , CO and $[\text{Ph}_2\text{P}]^+$ . . . . .                                 | 27 |

## References

- [1] Sheldrick, G.M. *SHELXT* – Integrated space-group and crystal-structure determination. *Acta Crystallogr., Sect. A* 2015. *71*, 3–8. doi: 10.1107/S2053273314026370
- [2] Dolomanov, O.V.; Bourhis, L.J.; Gildea, R.J.; Howard, J.A.K.; and Puschmann, H. OLEX2: a complete structure solution, refinement and analysis program. *J. Appl. Crystallogr.* 2009. *42*, 339–341. doi: 10.1107/S0021889808042726
- [3] Sheldrick, G.M. Crystal structure refinement with *SHELXL*. *Acta Crystallogr., Sect. C* 2015. *71*, 3–8. doi:10.1107/S2053229614024218
- [4] Burkhardt, A.; Pakendorf, T.; Reime, B.; Meyer, J.; Fischer, P.; Stübe, N.; Panneerselvam, S.; Lorbeer, O.; Stachnik, K.; Warmer, M.; Rödig, P.; Göries, D.; and Meents, A. Status of the crystallography beamlines at PETRA III. . *Eur. Phys. J. Plus* 2016. *131*, 56–64. doi:10.1140/epjp/i2016-16056-0
- [5] Neese, F.; Wennmohs, F.; Becker, U.; and Riplinger, C. The ORCA quantum chemistry program package. *J. Chem. Phys.* 2020. *152*, 224108. doi: 10.1063/5.0004608
- [6] Becke, A.D. Density-functional exchange-energy approximation with correct asymptotic behavior. *Phys. Rev. A* 1988. *38*, 3098–3100. doi: 10.1103/PhysRevA.38.3098
- [7] Perdew, J.P. Density-functional approximation for the correlation energy of the inhomogeneous electron gas. *Phys. Rev. B* 1986. *33*, 8822–8824. doi:10.1103/PhysRevB.33.8822
- [8] Perdew, J.P. Erratum: Density-functional approximation for the correlation energy of the inhomogeneous electron gas. *Phys. Rev. B* 1986. *34*, 7406–7406. doi:10.1103/PhysRevB.34.7406
- [9] Weigend, F. and Ahlrichs, R. Balanced basis sets of split valence, triple zeta valence and quadruple zeta valence quality for H to Rn: Design and assessment of accuracy. *Phys. Chem. Chem. Phys.* 2005. *7*, 3297–3305. doi:10.1039/B508541A

- [10] Weigend, F. Accurate Coulomb-fitting basis sets for H to Rn. *Phys. Chem. Chem. Phys.* 2006. 8, 1057–1065. doi:10.1039/B515623H
- [11] Hanwell, M.D.; Curtis, D.E.; Lonie, D.C.; Vandermeersch, T.; Zurek, E.; and Hutchison, G.R. Avogadro: an advanced semantic chemical editor, visualization, and analysis platform. *J. Cheminformatics* 2012. 4, 17. doi: 10.1186/1758-2946-4-17
